# Supplementary material for: Metabolomic Signature of Human Aortic Valve Stenosis
Source: PubMed Central journal article supplement — JACC Basic Transl Sci. 2020 Dec 16;5(12):1163–77. doi: 10.1016/j.jacbts.2020.10.001 (PMC7775961; doi:10.1016/j.jacbts.2020.10.001), 2020-12-16
Supplement: mmc1.pdf [file mmc1.pdf]

## Supplemental Material

### Metabolomic signature of human aortic valve stenosis

Arun Surendran<sup>1,2,3</sup>, Andrea Edel<sup>1,2</sup>, Mahesh Chandran<sup>3</sup>, Pascal Bogaert<sup>1</sup>, Pedram Hassan-Tash<sup>2</sup>, Aneesh Kumar Asokan<sup>3</sup>, Brett Hiebert<sup>1</sup>, Zahra Solati<sup>1,2</sup>, Shubhkarman Sandhawalia<sup>1</sup>, Michael Raabe<sup>4</sup>, Malek Kass<sup>5</sup>, Ashish Shah<sup>2,5</sup>, Davinder S. Jassal<sup>2,5</sup>, Abdul Jaleel<sup>3</sup> and Amir Ravandi<sup>1,2,5</sup>

<sup>1</sup>Cardiovascular Lipidomics Laboratory, St. Boniface Hospital, Albrechtsen Research Centre, <sup>2</sup>Department of Physiology and Pathophysiology, Rady Faculty of Health Sciences, University of Manitoba, <sup>3</sup>Mass Spectrometry & Proteomics Core Facility, Rajiv Gandhi Centre for Biotechnology, Kerala, <sup>4</sup>Section of Cardiac Surgery, <sup>5</sup>Section of Cardiology, Department of Medicine, Rady Faculty of Health Sciences, University of Manitoba

#### Corresponding author

Dr. Amir Ravandi  
Cardiovascular Lipidomics Laboratory,  
St. Boniface Hospital Albrechtsen Research Centre,  
351 Tache Ave,  
Winnipeg, MB Canada R2H 2A6  
Phone.204-235-3206 and 204-235-3414  
Fax.204-235-0793 and 204-235-0793  
Email: aravandi@sbgh.mb.ca

## **Supplemental Methods**

### **2.1 Chemicals**

All solvents were of LC-MS grade. Ultrapure water, acetonitrile, methanol, 2-propanol, formic acid, ammonium acetate, and ammonium formate were purchased from Thermo Fisher Scientific (Mississauga, ON). Chloroform was purchased from Millipore Sigma (Oakville, ON). Acetic acid and Leucine enkephalin were purchased from Sigma-Aldrich (St. Louis, MO) and the synthetic standard 1-heptadecanoyl-2-hydroxy-sn-glycero-3-phosphate (17:0 lysophosphatidic acid) from Avanti Polar Lipids (Alabaster, AL).

### **2.2 Procurement of tissues for analysis**

AV leaflets were obtained from 106 patients undergoing AV replacement surgery at St. Boniface Hospital (MB, Canada) between June 2014 and July 2015. The study was approved by the ethics committee of both the University of Manitoba and the St. Boniface hospital research ethics boards. Written informed consent was obtained from patients prior to their inclusion in the study. Patients were deemed eligible to participate if they were above 18 years of age and were free of any illness or condition that disallowed their ability to provide consent. Exclusion criteria included end stage renal disease on hemodialysis, suspicion of endocarditis or systemic infection. All valves underwent pathological assessment after removal and if endocarditis was suspected the valves were excluded. The indication for surgery for majority of our population was aortic valve stenosis. For the patients in the mild category the main surgical indication was aortic root surgery and the patients in moderate category was concomitant coronary artery disease. Preoperative transthoracic echocardiography was used to confirm the severity of aortic stenosis

according to the American Society of Echocardiography guidelines on valvular heart disease<sup>1</sup>. To investigate the diagnostic potentials of the differential metabolites and lipids discovered from the tissues, venous blood samples were collected (EDTA-plasma) from a sub-cohort (N=19) of the same population. The patients were on overnight fasting and blood was drawn before the anesthetic infusion prior to surgery. After surgical removal, the AV leaflets were immediately placed in an ice-cold solution containing EDTA/PBS, flash frozen and stored at -80°C until analysis. The average dwell time upon excision to flash-freezing was kept within 30 min. The study was conducted according to the declaration of Helsinki.

### **2.3 Aortic valve morphology and function**

The AV phenotype (i.e. bicuspid vs. tricuspid) was recorded. The Doppler echocardiographic indices of CAVS severity included peak aortic jet velocity (Vmax), peak and mean pressure gradients (MPG) obtained with the use of the modified Bernoulli equation, and the aortic valve area (AVA) calculated by the standard continuity equation.

Left ventricular geometry and function: LV ejection fraction (LVEF) was measured with the use of biplane Simpson method. The relative wall thickness ratio was calculated by dividing the sum of the LV posterior wall and inter-ventricular septal thicknesses by the LV internal dimension. Left ventricular mass was calculated with the corrected formula of the American Society of Echocardiography and was indexed to a 2.7 power of height<sup>2</sup>.

The degree of AV calcification was scored according to the criteria proposed by Yousry *et al*<sup>3,4</sup>. A single score value (C-score) from 1 to 5 was assigned for the ultrasound still frames to the whole valve. In short, non-thickened and non-calcified valves were classified as having score '1';

thickened but non-calcified valves as '2'; calcification spot(s) not exceeding one-third of the leaflet area as '3'; calcification spot(s) not exceeding two-thirds of the leaflet area as '4' and calcification spot(s) covering more than two-thirds of the leaflet area as '5'.

#### **2.4 Sample grouping based on CAVS severity**

CAVS severity was defined by hemodynamic parameters in accordance with the 2014 AHA/ACC guidelines<sup>5</sup> and accordingly patients were stratified into three disease stages as mild, moderate, and severe. In short, mild AS was defined by a mean pressure gradient (MPG) <20 mm Hg or aortic valve area (AVA) >1.5 cm<sup>2</sup>, moderate AS was defined as a MPG between 20 and 40 mm Hg or AVA between 1.0 and 1.5 cm<sup>2</sup>, and severe AS by a MPG ≥40 mm Hg or AVA ≤1.0 cm<sup>2</sup>. The same subjects were also categorized into three groups based on their echocardiographic calcification score (C-Score) in the 5-grade scoring system<sup>3,4</sup> as low, medium and high. Individual subjects with a score of '1' and '2' formed the 'low' calcification group, individuals with a score of '3' formed the 'medium' group, and individuals with a score of '4' and '5' formed the 'high' calcification group.

#### **2.5 Rate of CAVS progression**

The annualized rate of CAVS disease progression was defined as the change in maximum jet velocity ( $\Delta V_{max}$ ). This was retrospectively analysed in 50 (47%) of the 106 patients in our cohort. The annualized  $\Delta V_{max}$  was calculated by deducting the oldest available echocardiography  $V_{max}$  measurement available from the pre-surgery echocardiography data and dividing it by the time elapsed. The mean time gap between the pre-surgery and oldest available echocardiography reports was 4.4±2.7 yr (range; 0.4-9.8 yr). The following formula was used:

$$\text{Annualized } \Delta V_{\text{max}} \left( \frac{\text{m/s}}{\text{yr}} \right) = \frac{\text{Final } V_{\text{max}} - \text{Oldest } V_{\text{max}}}{\Delta T}$$

where 'Final  $V_{\text{max}}$ ' is the maximum jet velocity immediately prior to the surgery, 'Oldest  $V_{\text{max}}$ ' is the maximum jet velocity from the oldest available echocardiography report and  $\Delta T$  is the time elapsed (in years) between the latest and oldest echocardiography reports.

## **2.6 Extraction procedures and sample preparations**

The entire explanted valve was cryo-milled until a fine powder was obtained. 100 mg of the frozen powder was weighed and used for metabolite extraction by non-targeted analysis and 100 mg was used for lipid extraction by targeted analysis. The blood samples were collected in EDTA treated tubes and immediately centrifuged at 2500g for 10 minutes at 4°C in a refrigerated centrifuge to harvest plasma. Average time of blood collection to plasma separation and aliquoting were less than 30 min.

For non-targeted metabolomics analysis, the metabolites were extracted using a pre-chilled extraction solution containing 2:2:1 methanol, acetonitrile and water (vol/vol/vol). Approximately 100 mg of frozen tissue powder was suspended in 900  $\mu\text{l}$  of extraction solution, vortexed and sonicated in an ice-cold water bath sonicator for 10 min. The samples were then centrifuged at 3000g at 4°C for 20 min to remove the denatured proteins. The supernatant was dried down in a nitrogen evaporator and stored at -80°C until further analysis. The samples were finally reconstituted in 100  $\mu\text{l}$  of 50% methanol with 0.1% formic acid and transferred into a sampling vial immediately prior to injection. At the same time, a quality control (QC) sample was prepared by pooling equal aliquots (20  $\mu\text{l}$ ) from all samples.

For targeted lipidomics analysis, samples were extracted with 2:1 (vol/vol) chloroform and methanol containing 0.01% butylated hydroxytoluene (BHT) and PBS (pH 7.4) using a method previously described by Folch *et al*<sup>6</sup>. Approximately 100 mg of frozen tissue homogenate and 100 µl of plasma were used for extraction. 10 ng of 17:0 lysophosphatidic acid (17: 0 LysoPA) was spiked into each sample as the internal standard for quantitation purposes. The samples were spun at 1900g at 4°C for 5 min. The chloroform extracts were then dried down in a nitrogen evaporator. The dried extracts were finally reconstituted in 100 µl of 60:40 acetonitrile and water in 10 mM ammonium formate and 0.1% formic acid immediately prior to injection.

## **2.7 Non-targeted metabolomics analysis**

The metabolites were first separated using a UPLC® chromatographic system (ACQUITY, WATERS, Milford, USA) in both reverse phase (RP) and hydrophilic interaction liquid chromatography (HILIC) columns to analyze both polar and non-polar compounds. For RP liquid chromatography (RPLC) separation, a C18 (ACQUITY UPLC HSS T3 C18, 100 A0, 1.8 µm, 2.1 mm X 100 mm, Waters) column was used. The oven temperature was maintained at 40°C and the auto-sampler at 4°C. The eluent solutions consisted of aqueous (A) and organic (B) components, where A was ultrapure water and B was acetonitrile. Both A and B contained 0.1% formic acid or 0.1% acetic acid in positive ion mode and negative ion mode respectively. A 22 min linear gradient was performed as follows: 0-1 min, 1% B; 16-20 min, 100 %B; 22 min, 1% B. Samples were ionized in positive and negative ion modes employing the same gradient. HILIC separation was achieved using a BEH (ACQUITY BEH HILIC column, 130 A0, 1.7 µm, 2.1 mm X 150 mm, Waters) column. For HILIC, eluent solutions were 95% acetonitrile in 10 mM ammonium acetate (A) and 50%

acetonitrile in 10 mM ammonium acetate (B). Both A and B contained 0.1% formic acid or 0.1% acetic acid in positive ion mode and negative ion mode respectively. A 20 min linear gradient was performed as follows in both modes as follows: 0 min, 1% B; 5 min, 20% B; 10 min, 50% B; 14-16 min, 95 %B; 17-20 min, 1% B. For both RP and HILIC separations, the sample injection volume was 5  $\mu$ l and flow rate was set to 400  $\mu$ l/min.

For mass spectrometry analysis, an ion mobility spectrometry (IMS) in conjunction with the UPLC System coupled to a Quadrupole-Time of Flight (Q-TOF) mass spectrometer (SYNAPT-G2, Waters) was used. Both the systems were operated and controlled by MassLynx4.1 SCN781 workstation (Waters, MA, USA). Mass spectral analysis was conducted in positive and negative ion modes with ESI parameters as follows: capillary voltage, 2.85 KV; sample cone, 40 V; extraction cone, 6 V; IMS gas (N<sub>2</sub>) flow, 90 ml/min. To perform the mobility separation, the IMS T-Wave™ pulse height was set to 40 V during transmission and the IMS T-Wave™ velocity was set to 650 m/s. The travelling wave height was ramped linearly over 100% of the IMS cycle between 8 V and 20 V.

To ensure the accuracy and active calibration over the length of the sample queue, the  $m/z$  values of all ions acquired in the Q-TOF/MS were adjusted by LockSpray. The lock mass channel was sampled every 10 s. 2 ng/ $\mu$ l of leucine enkephalin (Sigma-Aldrich) was selected as lock mass compound for positive ( $m/z$  556.2771) and negative ( $m/z$  554.2615) ion mode. The time of flight analyzer (TOF) of the mass spectrometer was calibrated with a solution of 1 mM sodium formate (Sigma-Aldrich). This calibration set the analyzer to detect ions in the range of 50-1200  $m/z$ . The data acquisition was done in continuum format. The data were acquired by rapidly alternating

between two functions – Function-1 (low energy) and Function-2 (high energy). In Function-1, only low energy mass spectra (MS) were acquired and in Function-2, mass spectra at elevated collision energy with ion mobility (HDMSE) were acquired. In Function-2, collision energy was set to 4 eV in the Trap region of mass spectrometer and was ramped from 20 eV to 50 eV in the Transfer region of mass spectrometer to attain fragmentation in the HDMSE mode. The scan duration in each function was 0.5 s with an inter scan delay of 0.024 s.

In order to ensure system stabilization, the QC samples were repeatedly injected 10 times for nearly four hours before the formal sampling. To further monitor the reproducibility of the analytical platform, the QC samples were then re-injected after every five samples and at the end of the sample runs in line with the published guidelines<sup>7</sup>. The same volume of blank sample consisting of 50% methanol and 0.1% formic acid were injected in a random manner among all other samples as a means to ensure needle wash and to equilibrate the column, besides avoiding contamination among real samples. It is important to emphasize that global metabolomic extractions are not intended for quantitative extraction of all lipids. While some polar lipids may be fully extracted using the methods described here, others may be partially or minimally extracted. All specific changes in lipid classes measured with these metabolomic-oriented methods are speculative and must be confirmed with targeted methods as we have done for lysophosphatidic acids (LysoPA).

## **2.8 Targeted lipidomics analysis**

The analysis was carried out on a 4000 QTRAP<sup>®</sup> triple quadrupole mass spectrometer system (AB Sciex, Massachusetts, USA) as previously described<sup>8</sup>. Briefly, RPLC chromatography was



performed on a C18 (Ascentis Express C18, 2.7  $\mu\text{m}$ , 15 cm  $\times$  4.6 mm, Supelco Analytical, Pennsylvania, USA) column. The separation was achieved using a Prominence HPLC system (Shimadzu Corporation, Oregon, USA). The oven temperature was retained at 45°C and the auto-sampler at 4°C. The HPLC system ran a linear gradient elution program consisting of A (acetonitrile/water, 60:40 vol/vol) and B (isopropanol/acetonitrile, 90:10, vol/vol). Both A and B contained 10 mM ammonium formate and 0.1% formic acid. The linear gradient was optimized as follows: 0-1.5 min, 32% B; 4 min, 45% B; 5 min, 52% B; 8 min, 58% B; 11 min, 66% B; 14 min, 70% B; 18 min, 75% B; 21–25 min, 97% B; 25–30 min, 32% B. The sample injection volume was 30  $\mu\text{l}$  and the flow rate was set to 260  $\mu\text{l}/\text{min}$ .

Lysophosphatidic acids (LysoPA) were detected in negative ion mode via Multiple Reaction Monitoring (MRM) using the product ion 153.0  $m/z$  (Q3 mass) as described by Wijesinghe et al<sup>9</sup>. This ion (153.0  $m/z$ ) corresponds to the cleaved glycerol phosphate group of LysoPA. The mass spectrometry settings were as follows: curtain gas (psi), 26; collision gas, medium; ion spray voltage (V), -4500; temperature (°C), 500.0; ion source gas 1 (psi), 40.0; ion source gas 2 (psi), 30.0; declustering potential (V), -110, entrance potential (V), -10; collision energy (V), -30; collision cell exit potential (V), -20; and dwell time (ms), 100.

## **2.9 Data processing**

For the non-targeted metabolomics, MassLynx4.1 workstation was used to acquire the data from UPLC-Q-TOF/MS. The raw data were then imported to Progenesis QI v.2.1.5 software (Nonlinear Dynamics, UK) for automatic data processing<sup>10</sup>. Overall, the Progenesis co-detection workflow comprised selecting a reference run, alignment of the runs, peak picking, normalization,

deconvolution, compound identification and statistics. All stages are automated up to the point of compound identification. Retention time (RT)–charge ratio ( $m/z$ ) pairs were used to describe the spectral features. Data processing generated sets of 16,147, 7,056, 9,538 and 4,488 features respectively for RPLC+, RPLC-, HILIC+ and HILIC- ion modes. The repeated injection of QC samples throughout the entire analytical runs was used to ensure the technical reproducibility of UPLC-QTOF/MS. Features were considered reproducible if the coefficient of variation (CV) among QC samples was <30%, as suggested in the guidelines<sup>11,12</sup>. Those features which failed to meet this condition were removed from subsequent data processing. Subsequently, the data set was reduced to 1479, 1483, 980 and 427 features satisfying CV<30% in RPLC+, RPLC-, HILIC+ and HILIC- ion modes, respectively. In the filtered data set, the QC samples are clustered together in the PCA plot representing large homogeneity while experimental samples are clearly separated from the QC samples validating the data quality in non-targeted metabolic profiling (Supplemental Figure.S4). The built-in Metascope search engine of Progenesis was used to identify compounds using the in-house human database. At the end of this workflow, Progenesis Q1 produced a data matrix containing 583 putatively annotated metabolites and lipids (CV<30%) and their ion abundance (Supplemental Table.S9) which were considered for further statistical analysis. In addition to this ~600 identified metabolites and lipids profiled in the tissue using non-targeted LC-MS, there were approximately 3,700 reproducible unknown peaks, which remain unannotated even after the database search. A summary of the metabolomics workflow is depicted in Figure.1A.

For the targeted lipidomics, data were collected utilizing Analyst® software 1.6 (AB Sciex) from Q-Q-Q/MS. MultiQuant® software 2.1 (AB Sciex) was used to compare peak areas of different

LysoPA species with the internal standard (17:0 LysoPA). Relative amounts of each LysoPA species were then calculated based upon the amount of internal standard added. Results are presented as the amount of LysoPA (ng) detected per mg of AV tissue extracted or the amount of LysoPA (ng) detected per ml of blood plasma. [Supplemental Figure S5](#) provides the sensitivity limits and relative ionization intensities of LysoPA species. [Supplemental Table S14](#) provides the mass spectrometry conditions of quantifiable LysoPA species.

## **2.10 Tentative identification of metabolites and lipids**

At this stage, Progenesis has deconvoluted and quantified the compound ions. Progenesis 'MetaScope' is a built-in search tool used for the identification of compounds. The freely available human metabolite data set was downloaded (v4.0) from HMDB (Human Metabolome Database) database (<http://www.hmdb.ca/>). It contained 114,100 metabolite entries whose status varied from 'quantified' to 'predicted' in humans. To ensure the confidence in compound identification, the database search was limited to only those compounds from HMDB which are either previously quantified and/or detected in humans. For this purpose, an in-house fragment database was built with the help of Progenesis SDF Studio (Nonlinear Dynamics, UK) software. This in-house human database contained 8,971 entries in SDF (structure-data file) format. Progenesis MetaScope allows us to search for compound identifications based not only on compound properties such as neutral mass, isotopic distribution and retention time, but also on the fragmentation patterns produced by compounds in our experiment. To make definitive identifications, the experimental fragmentation data was compared to theoretical fragmentation patterns of a library of compounds, which are stored in the in-house fragment database. The

theoretical fragmentation patterns are generated by the simulated breaking of bonds in the structures of possible identifications<sup>13</sup> using the 'MetFrag' algorithm in Progenesis. From our list of 72 differential metabolites and lipids, 23 compounds were validated in this way. Compound identifications were searched for with a mass tolerance of  $\pm 10$  ppm. Those identifications confirmed with theoretical fragmentation scores were marked using a "\*" symbol in the Supplemental Table S7.

## **2.11 Statistics**

Statistical analysis was performed using SPSS v24 (IBM Corporation, Armonk, NY, USA) software. Values are presented as mean  $\pm$  standard deviation (SD), median (25<sup>th</sup>, 75<sup>th</sup> percentiles), or count (percentage) as applicable unless otherwise specified. The Kolmogorov-Smirnov test was used to test the normality assumption of data distribution. The Chi-square test was used for categorical variables, while Kruskal-Wallis test or one-way analysis of variance (ANOVA) was used for continuous variables to assess for statistical significance between sample groups as applicable based on data distribution with Tukey's post-hoc test for multiple pairwise comparisons. Tukey's test is only used if the overall ANOVA test is significant. For comparing two groups, the Chi-square test was used for categorical variables, while Mann-Whitney U test or t-test was used for continuous variables as applicable based on data distribution. Relationships between different continuous variables were calculated using Pearson's ( $r_p$ ) or Spearman's ( $r_s$ ) rank correlation coefficient using SPSS v24 or R statistical software v3.5.2. Clustered heatmap analysis and metabolomics pathway analysis (MetPA) were conducted using MetaboAnalyst v4.0 software, an open source R-package for metabolomics data analysis<sup>14</sup>. The Cytoscape software package v3.7.1

(National Institute of General Medical Sciences, Maryland) was used to plot the correlation network. A 2-sided  $p < 0.05$  was regarded as statistically significant.

## **2.12 Multiple linear regression analysis**

In order to determine the relationship between CAVS severity and the known clinical parameters of CAVS (age, gender, LDL level, HDL level, Triglycerides level, history of smoking, hypertension and presence of a bicuspid valve) along with amount of total LysoPA and individual lysophosphatidic acids, a standard multiple linear regression analysis was performed. Regression analysis was performed using SPSS v24 (IBM Corporation, Armonk, NY, USA) software employing the 'Enter' method of model selection using an alpha level of 0.05 to enter the model and alpha level of 0.10 to remain in the model.

When mean pressure gradient (MPG) was predicted, it was found that total LPA as well as individual lysophosphatidic acids namely 16:0 LysoPA, 18:0 LysoPA, 18:2 LysoPA and 20:4 LysoPA were significant predictors. When aortic valve area (AVA) was predicted, it was found that total LPA as well as individual lysophosphatidic acids namely 16:0 LysoPA, 18:0 LysoPA, 18:2 LysoPA and 22:6 LysoPA were significant predictors. 18:1 LysoPA was not a significant predictor in both models. This shows that that total LPA is an independent predictor of CAVS severity irrespective of other clinical variables. Adjusted regression (Beta) coefficient, standard error and p-value are given in the below table.

**Supplemental Figure S1:** Volcano plot comparing bicuspid (N=29) vs. tricuspid (N=73) aortic valve stenosis

A) RP ESI+

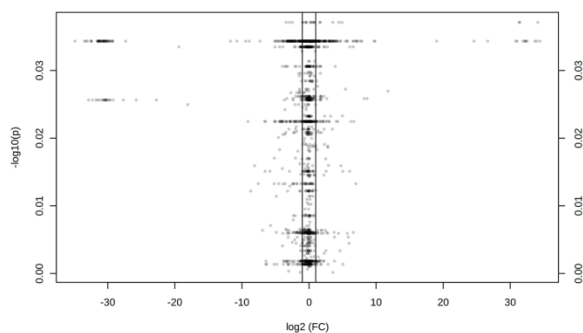

B) RP ESI-

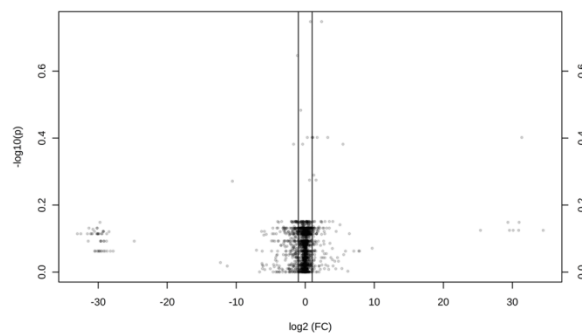

C) HILIC ESI+

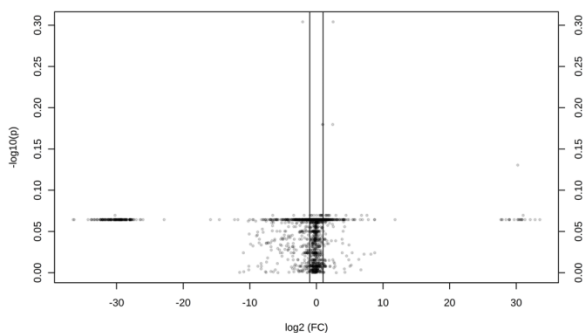

D) HILIC ESI-

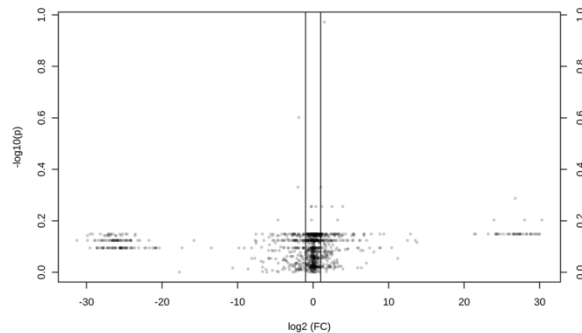

The volcano depicts no metabolomics diversity between bicuspid and tricuspid aortic valve stenosis using untargeted metabolic profiling (Fold change threshold: 2, p-value threshold: < 0.05 (FDR adjusted), features with CV<30% in QC samples).

**Abbreviations:** RP ESI+, Reversed-phase liquid chromatography separation in ESI positive mode; RP ESI-, Reversed-phase liquid chromatography separation in ESI negative mode; HILIC ESI+, Hydrophilic interaction liquid chromatography separation in electrospray ionization (ESI) positive mode; HILIC ESI-, Hydrophilic interaction liquid chromatography separation in ESI negative mode.

**Supplemental Figure S2:** Correlation between clinical parameters and lysophosphatidic acids

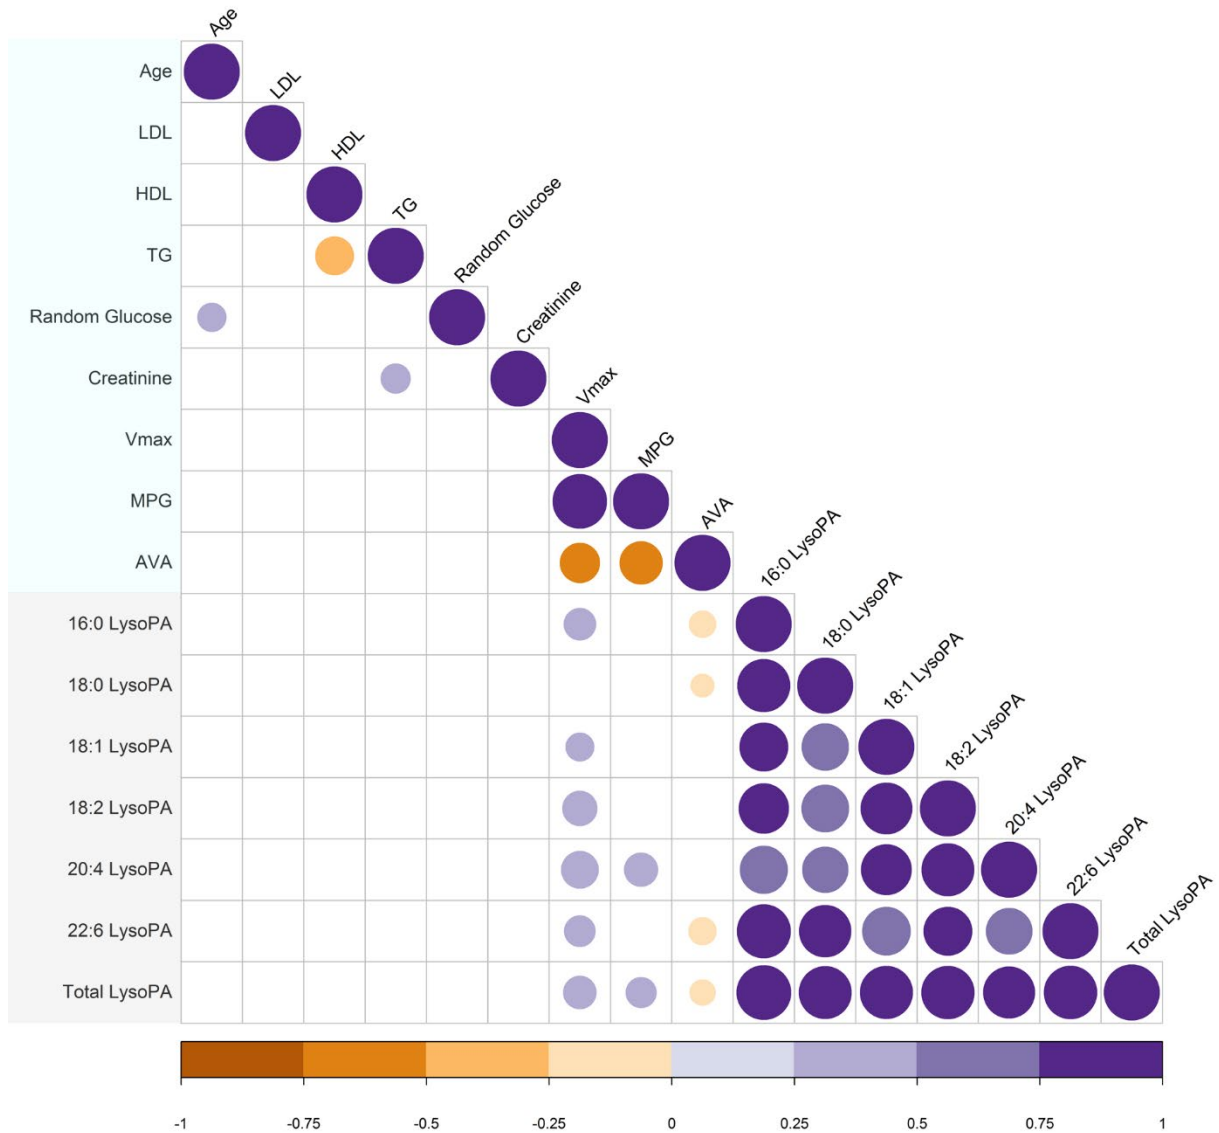

Lysophosphatidic acids (quantified via targeted analysis) were correlated with clinical parameters. Positive correlations are displayed in purple and negative correlations in orange color. Color intensity and the size of the circle are proportional to the correlation coefficients (Spearman correlation,  $r_s$ ). In this correlogram, correlations with p-value > 0.05 are considered insignificant and are left blank.

**Abbreviations:** LDL, low-density lipoprotein; HDL, high-density lipoprotein; TG, Triglycerides; Vmax, peak aortic jet velocity; MPG, mean pressure gradient; and AVA, aortic valve area.

**Supplemental Figure S3: Important risk factors for CAVS and lysophosphatidic acids**

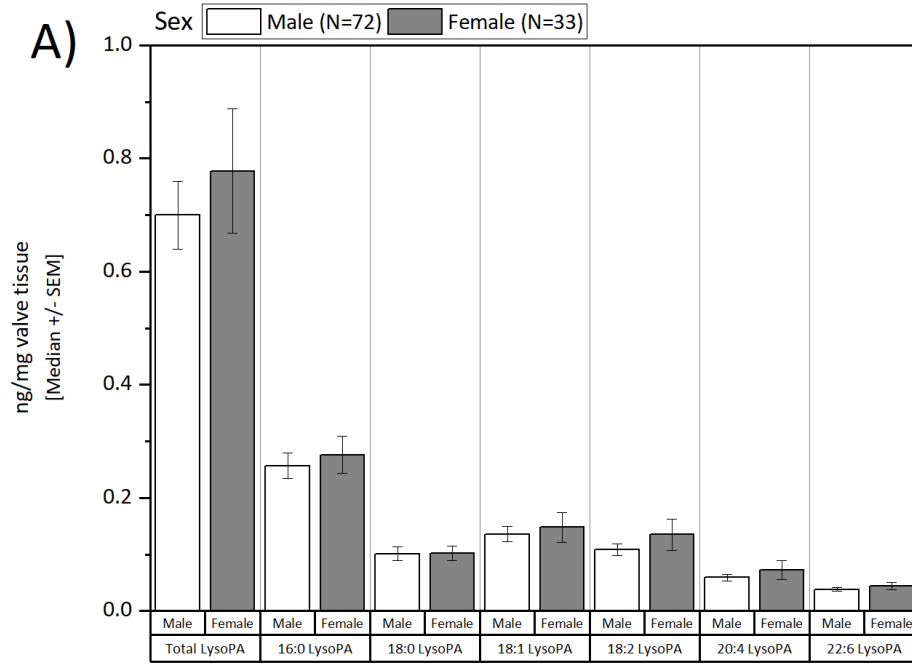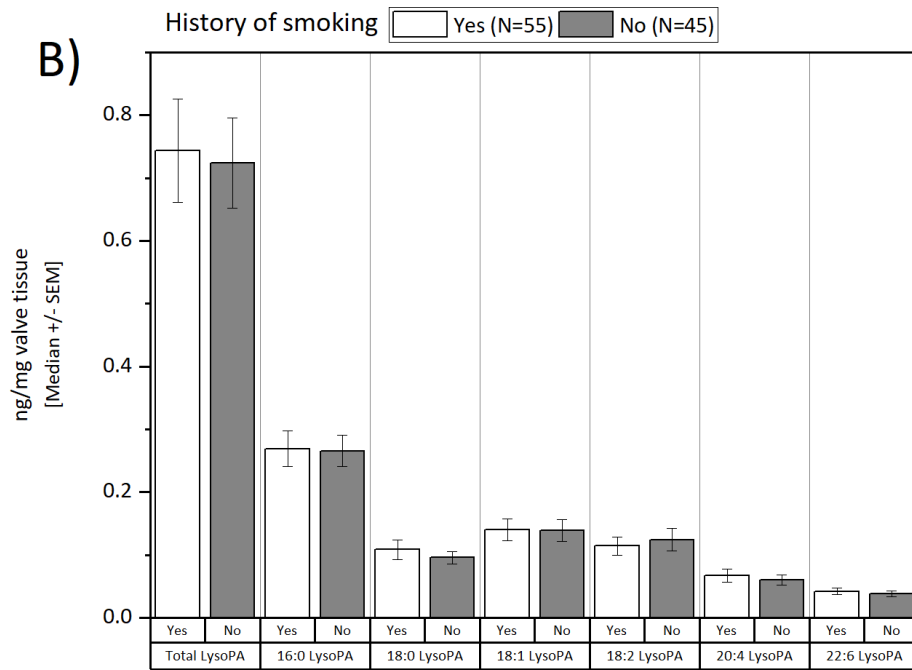



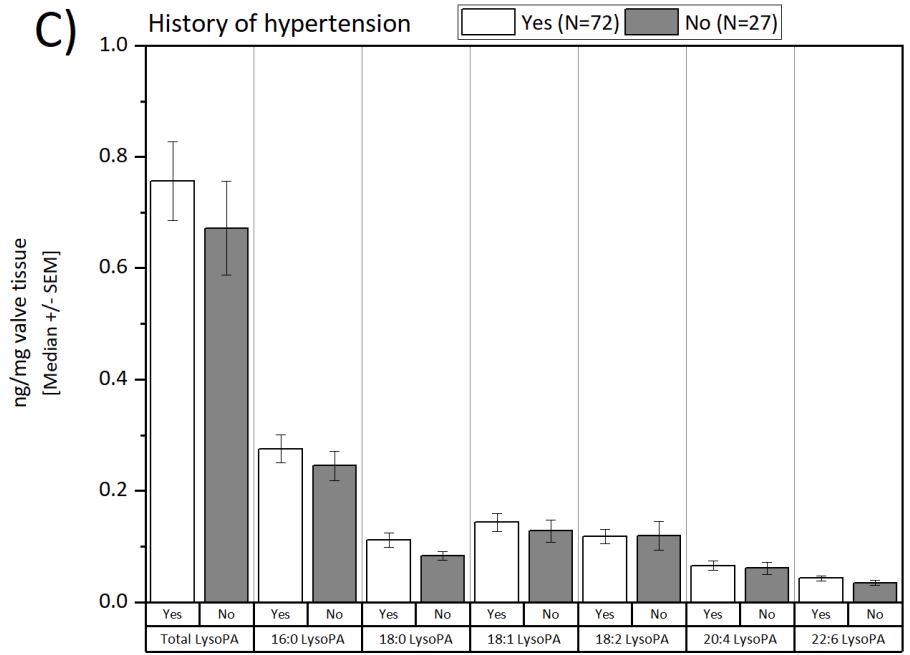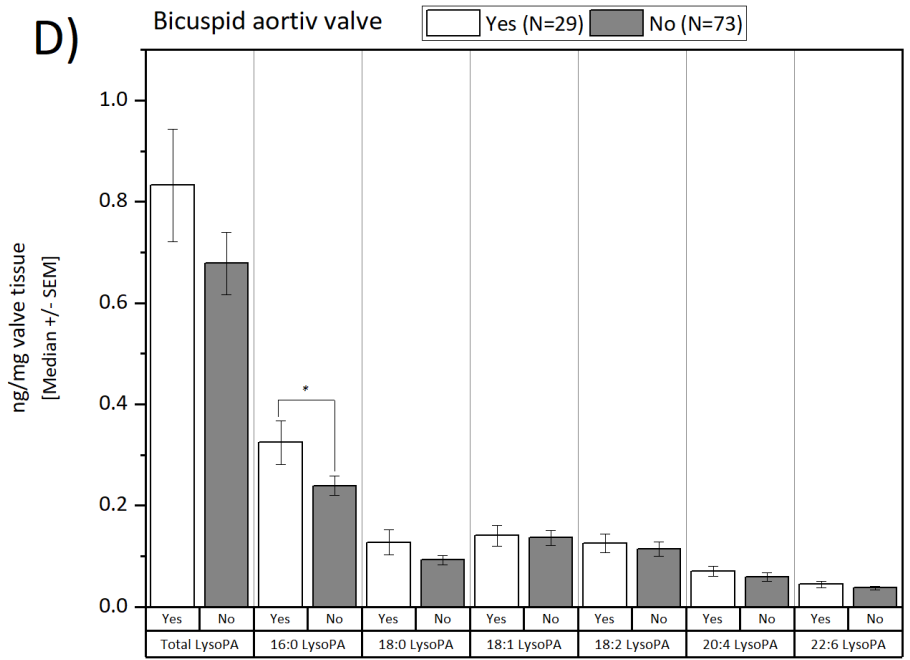

Based on independent t-test, sex difference, smoking habit, prevalence of hypertension and bicuspid aortic valve disease in patients with AS has no significant ( $p < 0.05$ ) association with total lysophosphatidic acid amount.

\*indicates the significance ( $p = 0.041$ ) after Student's t-test and 'N' denotes the number of samples in each category.

## Supplemental Figure S4: Principal component analysis (PCA) score plot

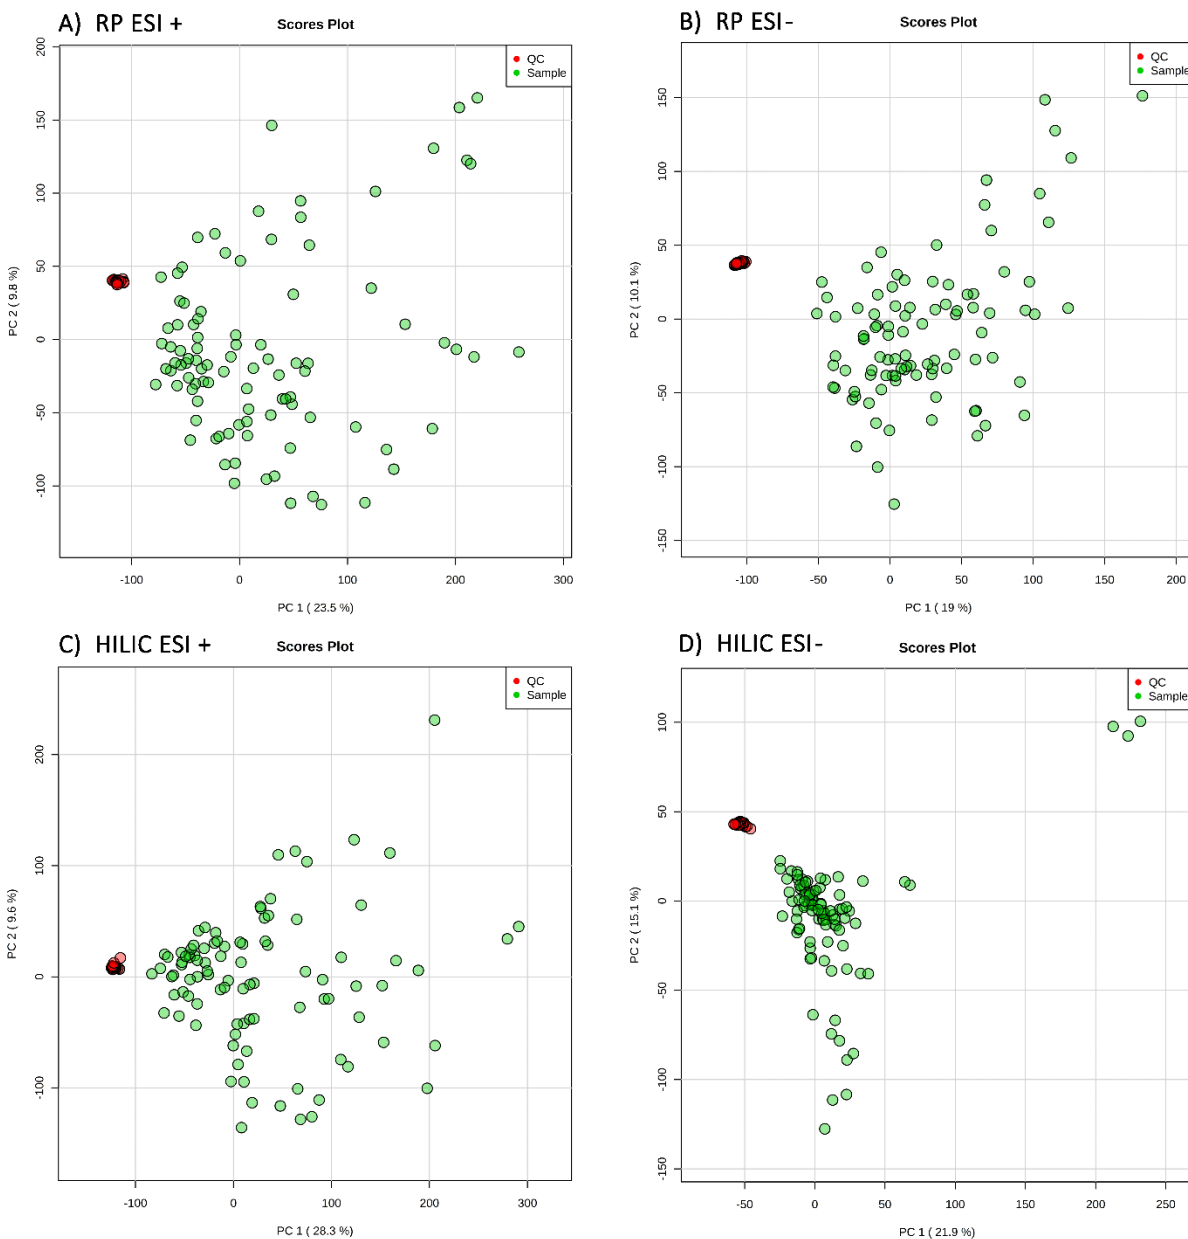

The PCA plot shows that quality control (QC) samples are tightly clustered validating the data quality in untargeted metabolic profiling.

**Abbreviations:** RP ESI+, Reversed-phase liquid chromatography separation in ESI positive mode; RP ESI-, Reversed-phase liquid chromatography separation in ESI negative mode; HILIC ESI+, Hydrophilic interaction liquid chromatography separation in electrospray ionization (ESI) positive mode; HILIC ESI-, Hydrophilic interaction liquid chromatography separation in ESI negative mode.

**Supplemental Figure S5:** Dose response factor assessment of commercially available lysophosphatidic acids (LysoPA species) compared to an internal standard (17:0 LysoPA) injected concurrently.

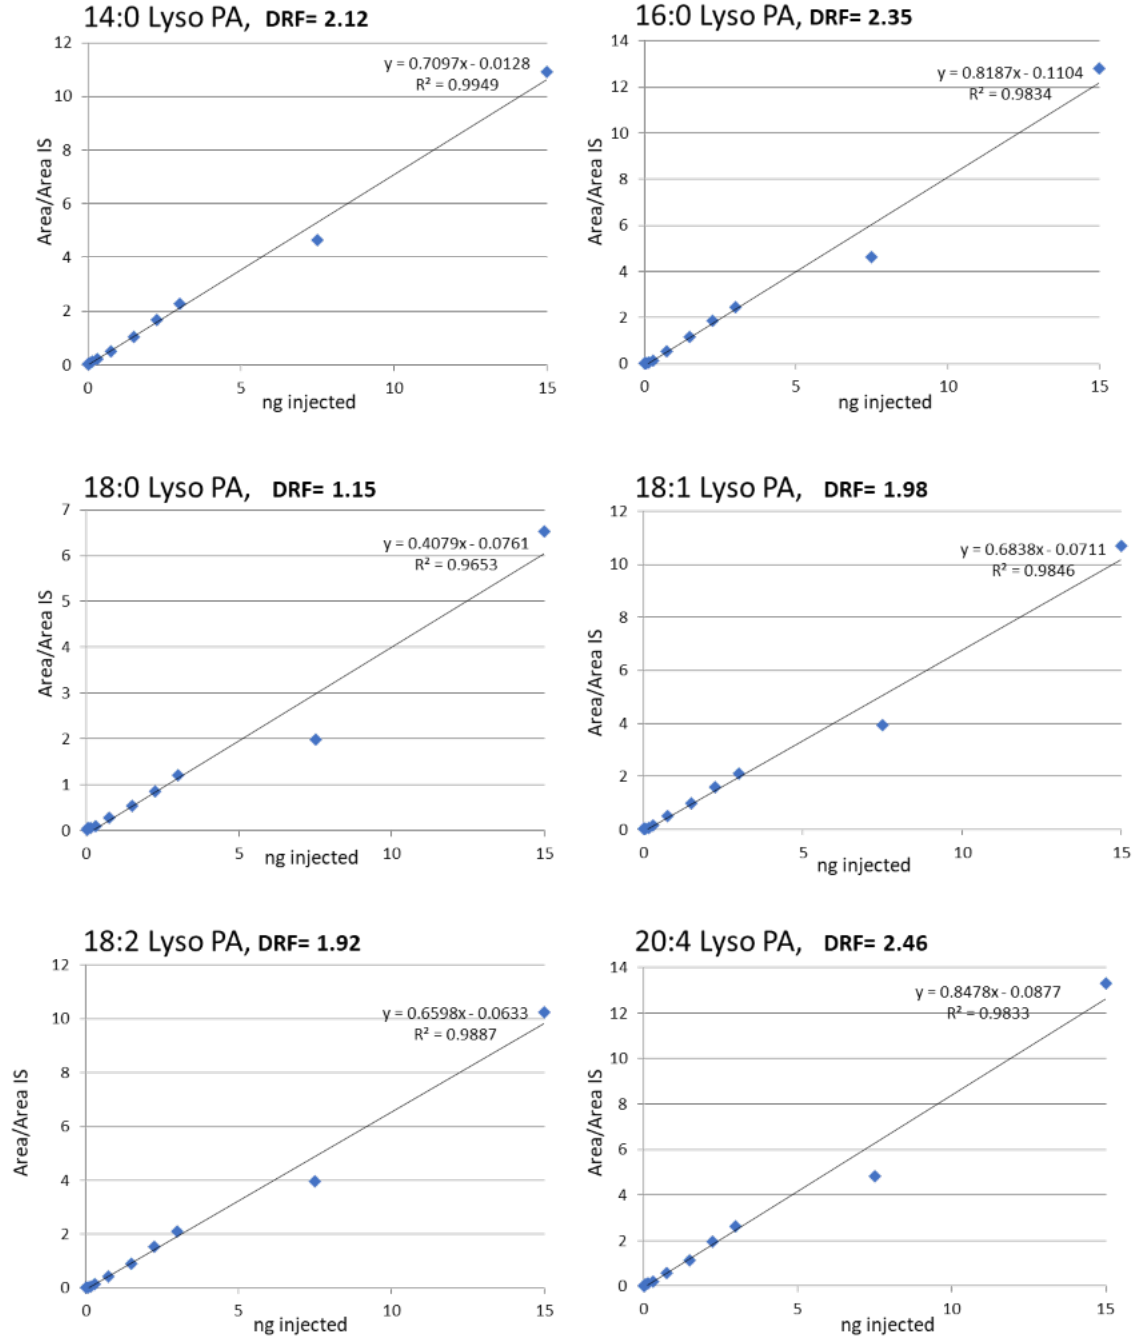

To investigate the sensitivity limits and relative ionization intensities of LysoPA species, a standard concentration curve of mixture of 14:0 LysoPA, 16:0 LysoPA, 18:0 LysoPA, 18:1 LysoPA and 20:4 LysoPA was analyzed in relation to 17:0 LysoPA to determine the dose response factor (DRF), and the signal response was measured as the area under the peak. Given the lack of commercially available standard for 22:6 LysoPA, the response factor was based on response factor for 20:4 LysoPA. The relative intensity compared to 17:0 LysoPA was accounted for in our concentration calculations. The method of detection for LPA species shows a linear response in the range from 15 femtogram to 15 nanogram for LPA standards.

**Supplemental Table S2:** Clinical demographics for subgroup comparison based on aortic valve area (AVA)

| Parameter                                                  | Study Population (n=106) |               |                | p-value       |        |
|------------------------------------------------------------|--------------------------|---------------|----------------|---------------|--------|
|                                                            | Clinical                 | Mild          | Moderate       |               | Severe |
|                                                            |                          | (N=13)        | (N=19)         | (N=66)        |        |
| Age, yrs                                                   |                          | 62 (53,77)    | 71 (63,80)     | 70 (64,79)    | 0.189  |
| Male sex, n (%)                                            |                          | 9 (69.2)      | 15 (78.9)      | 42 (63.6)     | 0.450  |
| Height, cm                                                 |                          | 171 (156,179) | 171 (168,175)  | 170 (163,177) | 0.877  |
| Weight, kg                                                 |                          | 78 (51,94)    | 86 (83,97)     | 84 (74,100)   | 0.188  |
| Body surface area, m <sup>2</sup>                          |                          | 1.8±0.3       | 2±0.1          | 2±0.2         | 0.092  |
| Body mass index, kg/ m <sup>2</sup>                        |                          | 25.3±5.1      | 30±3.8         | 30.3±6        | 0.018  |
| History of hypertension, n (%)                             |                          | 8 (61.5)      | 16 (84.2)      | 46 (69.7)     | 0.644  |
| Smoking History, n (%)                                     |                          | 3 (23.1)      | 9 (47.4)       | 40 (60.6)     | 0.199  |
| Current                                                    |                          | 0             | 1 (5.2)        | 9 (13.6)      |        |
| Previous                                                   |                          | 3 (23)        | 8 (42.1)       | 29 (43.9)     |        |
| Never                                                      |                          | 7 (53)        | 7 (36.8)       | 26 (39.3)     |        |
| Medication, n (%)                                          |                          |               |                |               |        |
| Antihypertensive treatment                                 |                          | 8 (61.5)      | 10 (52.6)      | 42 (63.6)     | 0.717  |
| ACE inhibitors                                             |                          | 5 (38.5)      | 7 (36.8)       | 16 (24.2)     | 0.329  |
| ARBs                                                       |                          | 1 (7.7)       | 2 (10.5)       | 7 (10.6)      | 0.954  |
| Statins                                                    |                          | 4 (30.8)      | 15 (78.9)      | 36 (54.5)     | 0.020  |
| Laboratory data                                            |                          |               |                |               |        |
| LDL cholesterol, mmol/l                                    |                          | 2.6 (1.3,4.2) | 2.2 (1.5,3.0)  | 2.5 (2.0,3.3) | 0.360  |
| HDL cholesterol, mmol/l                                    |                          | 1.3 (1.0,1.9) | 1.2 (1.0,1.4)  | 1.3 (1.0,1.6) | 0.338  |
| Triglycerides, mmol/l                                      |                          | 1.3 (0.9,1.7) | 1.3 (1.0,1.7)  | 1.4 (1.0,1.8) | 0.838  |
| Random glucose, mmol/l                                     |                          | 6.5 (5.6,8.7) | 6.2 (5.3,10.2) | 6.4 (5.3,8.0) | 0.888  |
| Creatinine, (μmol/l)                                       |                          | 80 (65,91)    | 86 (80,107)    | 82 (71,103)   | 0.368  |
| Doppler echocardiographic data                             |                          |               |                |               |        |
| Bicuspid aortic valve, n (%)                               |                          | 3 (23.1)      | 6 (31.6)       | 20 (30.3)     | 0.816  |
| Aortic valve calcification score, n (%)                    |                          |               |                |               |        |
| Calcification score = 1                                    |                          | 5 (38.4)      | 1 (5.2)        | 1 (1.5)       |        |
| Calcification score = 2                                    |                          | 5 (38.4)      | 7 (36.8)       | 13 (19.6)     |        |
| Calcification score = 3                                    |                          | 2 (15.3)      | 7 (36.8)       | 30 (45.4)     |        |
| Calcification score = 4                                    |                          | 0             | 2 (10.5)       | 15 (22.7)     |        |
| Calcification score = 5                                    |                          | 0             | 2 (10.5)       | 5 (7.5)       |        |
| Peak aortic jet velocity, m/s                              |                          | 2.5 (1.8,3.6) | 4.1 (3.7,4.5)  | 4.1 (3.8,4.9) | <0.001 |
| Peak pressure gradient, mm Hg                              |                          | 19 (13,46)    | 64 (50,79)     | 70 (57,89)    | <0.001 |
| Mean pressure gradient, mm Hg                              |                          | 10 (6,23)     | 38 (30,46)     | 45 (34,59)    | <0.001 |
| Aortic valve area, cm <sup>2</sup>                         |                          | 1.8 (1.6,2.4) | 1.0 (1.0,1.2)  | 0.8 (0.7,0.9) | <0.001 |
| Indexed aortic valve area, cm <sup>2</sup> /m <sup>2</sup> |                          | 0.9 (0.7,1.2) | 0.5 (0.5,0.6)  | 0.4 (0.3,0.5) | <0.001 |
| Left ventricular mass index, g/m <sup>2</sup>              |                          | 173 (139,192) | 124 (85,149)   | 114 (101,134) | 0.01   |
| Left ventricular ejection fraction                         |                          | 55 (45,60)    | 60 (60,60)     | 60 (59,60)    | 0.058  |

Values are reported as mean  $\pm$  standard deviation (SD), median (25th, 75th percentiles), or count (percentage) as applicable. The Chi-square test was used for categorical variables, while Kruskal-Wallis test or one-way analysis of variance (ANOVA) was used for continuous variables to assess for statistical significance between sample groups as applicable based on data distribution. **Abbreviations:** ACE, angiotensin-converting-enzyme; ARBs, angiotensin II receptor blockers; HDL, high-density lipoprotein; LDL, low-density lipoprotein

**Supplemental Table S3:** Clinical demographics for subgroup comparison based on aortic valve calcification score (C-Score)

| Parameter                               | Study Population (n=106) |                  |                 | p-value |
|-----------------------------------------|--------------------------|------------------|-----------------|---------|
|                                         | Low<br>(N=38)            | Medium<br>(N=39) | High<br>(N=25)  |         |
| Age, yrs                                | 67.5 (60,76)             | 70 (65,80)       | 68 (63,78)      | 0.215   |
| Male sex, n (%)                         | 26 (68.4)                | 27 (69.2)        | 18 (72)         | 0.953   |
| Height, cm                              | 169.2 $\pm$ 9.8          | 170.6 $\pm$ 7    | 171.3 $\pm$ 8.1 | 0.616   |
| Weight, kg                              | 84 (72,95)               | 86 (78,100)      | 82 (70,100)     | 0.415   |
| Body surface area, m <sup>2</sup>       | 2.0 (1.8,2.0)            | 2.0 (1.9,2.1)    | 2.0 (1.8,2.1)   | 0.291   |
| Body mass index, kg/m <sup>2</sup>      | 28.1 $\pm$ 5             | 30.7 $\pm$ 5.6   | 29.2 $\pm$ 6.3  | 0.133   |
| History of hypertension, n (%)          | 24 (63.2)                | 26 (66.7)        | 21 (84)         | 0.388   |
| Smoking History, n (%)                  | 17 (44.7)                | 21 (53.8)        | 15 (60)         | 0.481   |
| Current                                 | 2 (5.2)                  | 4 (10.2)         | 4 (16)          |         |
| Previous                                | 15 (39.4)                | 17 (43.5)        | 11 (44)         |         |
| Never                                   | 19 (50)                  | 16 (41)          | 9 (36)          |         |
| Medication, n (%)                       |                          |                  |                 |         |
| Antihypertensive treatment              | 22 (57.9)                | 25 (64.1)        | 15 (60)         | 0.830   |
| ACE inhibitors                          | 16 (42.1)                | 8 (20.5)         | 7 (28)          | 0.117   |
| ARBs                                    | 5 (13.2)                 | 4 (10.3)         | 2 (8)           | 0.812   |
| Statins                                 | 16 (42.1)                | 24 (61.5)        | 16 (64)         | 0.085   |
| Laboratory data                         |                          |                  |                 |         |
| LDL cholesterol, mmol/l                 | 2.9 $\pm$ 1.3            | 2.4 $\pm$ 0.8    | 2.5 $\pm$ 1.1   | 0.165   |
| HDL cholesterol, mmol/l                 | 1.3 (1.0,1.6)            | 1.3 (1.1,1.5)    | 1.3 (1.0,1.6)   | 0.951   |
| Triglycerides, mmol/l                   | 1.4 (1.0,1.7)            | 1.4 (0.9,1.7)    | 1.3 (0.8,1.6)   | 0.956   |
| Random glucose, mmol/l                  | 6.4 (5.5,8.4)            | 6.7 (5.3,8.9)    | 5.7 (5.2,7.2)   | 0.554   |
| Creatinine, ( $\mu$ mol/l)              | 80 (62,94)               | 86 (73,110)      | 83 (71,99)      | 0.140   |
| Doppler echocardiographic data          |                          |                  |                 |         |
| Bicuspid aortic valve, n (%)            | 9(23.7)                  | 11(28.2)         | 9(36)           | 0.495   |
| Aortic valve calcification score, n (%) |                          |                  |                 |         |
| Calcification score = 1                 | 10 (26.3)                | 0                | 0               |         |
| Calcification score = 2                 | 28 (73.6)                | 0                | 0               |         |
| Calcification score = 3                 | 0                        | 39 (100)         | 0               |         |
| Calcification score = 4                 | 0                        | 0                | 18 (72)         |         |
| Calcification score = 5                 | 0                        | 0                | 7 (28)          |         |

|                                                                                                                                                                                                                                                                                                                                                                                                                                                                                                                                                                                                                                                                                                                                                                                                              |               |               |               |       |
|--------------------------------------------------------------------------------------------------------------------------------------------------------------------------------------------------------------------------------------------------------------------------------------------------------------------------------------------------------------------------------------------------------------------------------------------------------------------------------------------------------------------------------------------------------------------------------------------------------------------------------------------------------------------------------------------------------------------------------------------------------------------------------------------------------------|---------------|---------------|---------------|-------|
| Peak aortic jet velocity, m/s                                                                                                                                                                                                                                                                                                                                                                                                                                                                                                                                                                                                                                                                                                                                                                                | 3.6 (2.6,4.2) | 4.1 (3.9,4.5) | 4.2 (3.8,5.0) | 0.001 |
| Peak pressure gradient, mm Hg                                                                                                                                                                                                                                                                                                                                                                                                                                                                                                                                                                                                                                                                                                                                                                                | 57 (31,70)    | 67 (56,81)    | 71 (60,101)   | 0.001 |
| Mean pressure gradient, mm Hg                                                                                                                                                                                                                                                                                                                                                                                                                                                                                                                                                                                                                                                                                                                                                                                | 30 (14,45)    | 40 (35,53)    | 46 (34,60)    | 0.002 |
| Aortic valve area, cm <sup>2</sup>                                                                                                                                                                                                                                                                                                                                                                                                                                                                                                                                                                                                                                                                                                                                                                           | 0.9 (0.8,1.6) | 0.8 (0.7,1.0) | 0.9 (0.6,1.0) | 0.013 |
| Indexed aortic valve area, cm <sup>2</sup> /m <sup>2</sup>                                                                                                                                                                                                                                                                                                                                                                                                                                                                                                                                                                                                                                                                                                                                                   | 0.5 (0.4,0.7) | 0.4 (0.3,0.5) | 0.4 (0.3,0.5) | 0.004 |
| Left ventricular mass index, g/m <sup>2</sup>                                                                                                                                                                                                                                                                                                                                                                                                                                                                                                                                                                                                                                                                                                                                                                | 143 (124,172) | 111 (97,141)  | 110 (97,130)  | 0.004 |
| Left ventricular ejection fraction                                                                                                                                                                                                                                                                                                                                                                                                                                                                                                                                                                                                                                                                                                                                                                           | 60 (60,60)    | 60 (60,60)    | 60 (60,60)    | 0.394 |
| <p>Values are reported as mean ± standard deviation (SD), median (25<sup>th</sup>, 75<sup>th</sup> percentiles), or count (percentage) as applicable. The Chi-square test was used for categorical variables, while Kruskal-Wallis test or one-way analysis of variance (ANOVA) was used for continuous variables to assess for statistical significance between sample groups as applicable based on data distribution. Those subjects with a score of '1' and '2' formed the 'low' calcification group, those with a score of '3' formed the 'medium' group and those with a score of '4' and '5' formed the 'high' calcification group. <u>Abbreviations</u>: ACE, angiotensin-converting-enzyme; ARBs, angiotensin II receptor blockers; HDL, high-density lipoprotein; LDL, low-density lipoprotein</p> |               |               |               |       |

**Supplemental Table S4:** Significant ( $p < 0.01$ ) compounds identified by grading AS severity as mild, moderate and severe based on mean pressure gradient (MPG)

| Sl.No | Metabolites/Lipids            | <i>m/z</i> | RT    | Anova (p) | q Value  | CV%   | Max Fold Change | Highest Mean | Lowest Mean |
|-------|-------------------------------|------------|-------|-----------|----------|-------|-----------------|--------------|-------------|
| 1     | 5,6-Epoxy-eicosatrienoic acid | 319.2275   | 9.17  | 8.13E-07  | 3.82E-04 | 12.31 | 2.689391        | Moderate     | Mild        |
| 2     | Phenylacetaldehyde            | 121.0647   | 1.15  | 9.52E-07  | 2.44E-04 | 7.04  | 2.864115        | Mild         | Severe      |
| 3     | Ketoleucine                   | 95.049     | 1.14  | 1.43E-06  | 3.20E-04 | 7.91  | 2.999719        | Mild         | Severe      |
| 4     | Linalyl oxide                 | 339.2524   | 10.72 | 1.64E-06  | 7.04E-04 | 24.82 | 5.490511        | Mild         | Severe      |
| 5     | 2,4-Dimethylfuran             | 119.0487   | 1.14  | 3.91E-06  | 6.09E-04 | 9.52  | 2.7907          | Mild         | Severe      |
| 6     | Tryptamine                    | 178.1349   | 4.37  | 6.50E-06  | 9.50E-04 | 23.73 | 33.09287        | Mild         | Moderate    |
| 7     | Uracil                        | 77.0124    | 1.15  | 1.18E-05  | 0.001    | 25.13 | 4.048203        | Mild         | Severe      |
| 8     | Enterodiol                    | 283.136    | 7.52  | 7.37E-05  | 0.009    | 12.02 | 3.907599        | Mild         | Moderate    |
| 9     | MG(20:1)                      | 385.333    | 15.16 | 8.13E-05  | 0.006    | 15.28 | 2.222748        | Moderate     | Mild        |
| 10    | Angiotensin II                | 1063.569   | 12.01 | 8.38E-05  | 0.007    | 22.98 | 4.714409        | Severe       | Mild        |
| 11    | Pyridinoline                  | 393.1761   | 6.68  | 1.31E-04  | 0.008    | 21.9  | 3.070618        | Mild         | Moderate    |
| 12    | LysoPE(18:2)                  | 478.2883   | 7.78  | 2.90E-04  | 0.014    | 14.52 | 2.4183          | Mild         | Severe      |
| 13    | Deoxypyridinoline             | 430.2334   | 4.18  | 2.99E-04  | 0.015    | 25.41 | 2.784497        | Mild         | Moderate    |
| 14    | Indoleacrylic acid            | 188.0712   | 5.65  | 4.99E-04  | 0.023    | 16.79 | 2.799811        | Severe       | Mild        |
| 15    | Cholic acid                   | 447.2544   | 13.82 | 5.52E-04  | 0.022    | 21.44 | 3.856675        | Severe       | Mild        |
| 16    | MG(24:1)                      | 421.3675   | 12.24 | 6.53E-04  | 0.042    | 14.03 | 2.041157        | Moderate     | Mild        |
| 17    | PC(22:6_p-18:0)               | 835.6387   | 12.24 | 7.01E-04  | 0.031    | 24.18 | 10.38359        | Severe       | Mild        |
| 18    | Palmitic amide                | 256.2631   | 1.14  | 7.91E-04  | 0.033    | 25.29 | 3.011334        | Moderate     | Mild        |



|    |                           |          |       |       |       |       |          |          |          |
|----|---------------------------|----------|-------|-------|-------|-------|----------|----------|----------|
| 19 | MG(22:5)                  | 387.2899 | 1.15  | 0.002 | 0.057 | 15.86 | 2.197309 | Mild     | Moderate |
| 20 | CMPF                      | 263.0885 | 1.14  | 0.002 | 0.065 | 11.64 | 2.992936 | Mild     | Moderate |
| 21 | 15-Hydroxyeicosatrienoate | 321.2421 | 9.16  | 0.002 | 0.082 | 22.45 | 2.366902 | Moderate | Mild     |
| 22 | PC(p-18:1_22:1)           | 843.6963 | 5.47  | 0.002 | 0.047 | 19.86 | 2.802354 | Severe   | Mild     |
| 23 | 5-AMMU                    | 179.0566 | 3.01  | 0.004 | 0.123 | 20.23 | 4.743777 | Moderate | Mild     |
| 24 | PC(18:0_22:0)             | 810.6659 | 5.33  | 0.004 | 0.073 | 25.23 | 5.42359  | Severe   | Mild     |
| 25 | Tetrahydrocortisone       | 387.2157 | 1.14  | 0.006 | 0.129 | 26.39 | 4.816644 | Mild     | Severe   |
| 26 | Uroporphyrin III          | 831.2429 | 12.24 | 0.006 | 0.131 | 24.87 | 7.444387 | Severe   | Mild     |
| 27 | N-Methyl-lysine           | 319.2322 | 12.11 | 0.008 | 0.17  | 7.34  | 4.210005 | Mild     | Moderate |
| 28 | PI(16:0_18:0)             | 877.5197 | 5.76  | 0.008 | 0.102 | 13.55 | 5.392857 | Severe   | Mild     |

**Supplemental Table S5:** Significant ( $p < 0.01$ ) compounds identified by grading AS severity as mild, moderate and severe based on aortic valve area (AVA).

| Sl.No | Metabolites/Lipids            | <i>m/z</i> | RT    | Anova (p) | q Value  | CV%   | Max Fold Change | Highest Mean | Lowest Mean |
|-------|-------------------------------|------------|-------|-----------|----------|-------|-----------------|--------------|-------------|
| 1     | Phenylacetaldehyde            | 121.0647   | 1.15  | 3.76E-09  | 4.37E-06 | 7.04  | 3.11903         | Mild         | Moderate    |
| 2     | Ketoleucine                   | 95.049     | 1.14  | 1.19E-07  | 3.13E-05 | 7.91  | 3.313858        | Mild         | Moderate    |
| 3     | 2,4-Dimethylfuran             | 119.0487   | 1.14  | 1.84E-07  | 4.49E-05 | 9.52  | 2.936738        | Mild         | Moderate    |
| 4     | Dodecanoylcarnitine           | 342.2646   | 9.73  | 3.75E-07  | 3.80E-04 | 14.28 | 2.823645        | Moderate     | Mild        |
| 5     | 5,6-Epoxy-eicosatrienoic acid | 319.2275   | 9.17  | 2.71E-06  | 0.001    | 12.31 | 6.410601        | Severe       | Mild        |
| 6     | 15-Hydroxyeicosatrienoate     | 321.2421   | 9.16  | 4.78E-06  | 0.002    | 22.45 | 10.78818        | Severe       | Mild        |
| 7     | Palmitic amide                | 256.2631   | 1.14  | 5.57E-06  | 4.98E-04 | 25.29 | 5.675308        | Severe       | Mild        |
| 8     | Cholic acid                   | 447.2544   | 13.82 | 2.48E-05  | 0.002    | 21.44 | 38.18958        | Severe       | Mild        |
| 9     | Deoxy pyridinoline            | 430.2334   | 4.18  | 3.12E-05  | 0.002    | 25.41 | 2.822804        | Mild         | Severe      |

|    |                                |          |       |          |       |       |          |          |          |
|----|--------------------------------|----------|-------|----------|-------|-------|----------|----------|----------|
| 10 | LysoPE(18:2)                   | 478.2883 | 7.78  | 3.48E-05 | 0.002 | 14.52 | 2.918989 | Mild     | Severe   |
| 11 | Angiotensin II                 | 1063.569 | 12.01 | 6.41E-05 | 0.003 | 22.98 | 8.823877 | Severe   | Mild     |
| 12 | Linalyl oxide                  | 339.2524 | 10.72 | 9.03E-05 | 0.008 | 24.82 | 4.452754 | Mild     | Severe   |
| 13 | Pyridinoline                   | 393.1761 | 6.68  | 1.26E-04 | 0.006 | 21.9  | 3.347183 | Mild     | Moderate |
| 14 | $\alpha$ -CEHC                 | 277.1431 | 8.21  | 1.47E-04 | 0.01  | 18.21 | 2.551602 | Mild     | Severe   |
| 15 | PC(p-18:1_22:1)                | 843.6963 | 5.47  | 1.64E-04 | 0.007 | 19.86 | 4.643067 | Severe   | Mild     |
| 16 | MG(24:1)                       | 421.3675 | 12.24 | 1.92E-04 | 0.011 | 14.03 | 17.15548 | Severe   | Mild     |
| 17 | N-Methyl-lysine                | 319.2322 | 12.11 | 2.41E-04 | 0.012 | 7.34  | 5.609939 | Mild     | Moderate |
| 18 | LysoPE(22:6)                   | 526.2909 | 7.83  | 2.54E-04 | 0.009 | 10.8  | 2.656826 | Mild     | Severe   |
| 19 | Enterodiol                     | 283.136  | 7.52  | 3.36E-04 | 0.014 | 12.02 | 3.719567 | Mild     | Severe   |
| 20 | LysoPA(16:0)                   | 391.2248 | 13.14 | 3.37E-04 | 0.014 | 13.48 | 2.728048 | Severe   | Mild     |
| 21 | LysoPC(22:0)                   | 562.4207 | 11.81 | 6.00E-04 | 0.017 | 17.42 | 2.517117 | Severe   | Mild     |
| 22 | Uracil                         | 77.0124  | 1.15  | 6.97E-04 | 0.015 | 25.13 | 4.689703 | Mild     | Moderate |
| 23 | APGPR Enterostatin             | 477.261  | 9.34  | 7.39E-04 | 0.021 | 24.05 | 2.603521 | Mild     | Severe   |
| 24 | Tryptamine                     | 178.1349 | 4.37  | 7.45E-04 | 0.016 | 23.73 | 36.07912 | Mild     | Severe   |
| 25 | MG(20:1)                       | 385.333  | 15.16 | 7.54E-04 | 0.02  | 20.61 | 4.684099 | Severe   | Mild     |
| 26 | Glycocholic acid               | 464.3014 | 5.7   | 7.79E-04 | 0.021 | 26.94 | 9.442069 | Moderate | Mild     |
| 27 | MG(15:0)                       | 299.2602 | 1.08  | 8.44E-04 | 0.017 | 19.22 | 2.025486 | Severe   | Mild     |
| 28 | 13-Hydroxyoctadecadienoic acid | 295.2283 | 8.57  | 0.001    | 0.026 | 11.66 | 3.074781 | Severe   | Mild     |
| 29 | PE(16:0_18:0)                  | 419.3516 | 14.03 | 0.001    | 0.026 | 20.94 | 15.55458 | Moderate | Mild     |
| 30 | 9,10-Epoxyoctadecenoic acid    | 295.2276 | 8.7   | 0.001    | 0.027 | 14.85 | 4.550987 | Severe   | Mild     |
| 31 | 5-AMMU                         | 179.0566 | 3.01  | 0.001    | 0.028 | 20.23 | 6.168584 | Moderate | Mild     |
| 32 | Docosatrienoic acid            | 333.2789 | 12.97 | 0.001    | 0.029 | 22.54 | 2.449404 | Moderate | Mild     |
| 33 | 2-Phenylethanol                | 105.07   | 1.14  | 0.001    | 0.02  | 26.46 | 2.09323  | Mild     | Severe   |
| 34 | 2-Methylacetophenone           | 440.2679 | 0.84  | 0.001    | 0.02  | 28.45 | 3.3314   | Moderate | Mild     |
| 35 | PC(22:6_p-18:0)                | 835.6387 | 12.24 | 0.001    | 0.023 | 24.18 | 14.09519 | Moderate | Mild     |
| 36 | Glycoursodeoxycholic acid      | 448.3071 | 6.73  | 0.002    | 0.032 | 13.88 | 4.473352 | Moderate | Mild     |
| 37 | Cholenic acid                  | 355.2638 | 11.89 | 0.002    | 0.034 | 19.17 | 2.288637 | Moderate | Mild     |

|    |                                          |          |       |       |       |       |          |          |          |
|----|------------------------------------------|----------|-------|-------|-------|-------|----------|----------|----------|
| 38 | MG(20:3)                                 | 417.24   | 13.52 | 0.002 | 0.037 | 24.97 | 2.058725 | Severe   | Mild     |
| 39 | MG(20:5)                                 | 394.295  | 5.66  | 0.002 | 0.03  | 17.83 | 2.369179 | Moderate | Mild     |
| 40 | CMPF                                     | 263.0885 | 1.14  | 0.002 | 0.029 | 11.64 | 2.982952 | Mild     | Moderate |
| 41 | Tetrahydrocortisone                      | 387.2157 | 1.14  | 0.002 | 0.025 | 26.39 | 6.167196 | Mild     | Moderate |
| 42 | Uroporphyrin III                         | 831.2429 | 12.24 | 0.002 | 0.03  | 24.87 | 7.068897 | Moderate | Mild     |
| 43 | LysoPA(18:2)                             | 399.2274 | 12.48 | 0.003 | 0.048 | 23.5  | 3.958626 | Severe   | Mild     |
| 44 | Nutriacholic acid                        | 411.2505 | 11.45 | 0.003 | 0.041 | 15.4  | 2.61748  | Moderate | Mild     |
| 45 | SM C16:1                                 | 680.5661 | 1.09  | 0.003 | 0.037 | 23.9  | 9.593328 | Severe   | Mild     |
| 46 | Androsterone sulfate                     | 369.1734 | 6.58  | 0.004 | 0.05  | 22.28 | 2.97893  | Mild     | Severe   |
| 47 | 3A,7 $\alpha$ -<br>dihydroxycoprostanate | 433.3318 | 12.17 | 0.004 | 0.052 | 11.07 | 2.252986 | Severe   | Mild     |
| 48 | Linoleoyl ethanolamide                   | 324.2893 | 1.17  | 0.004 | 0.049 | 15.53 | 2.816207 | Severe   | Mild     |
| 49 | Eicosenoic acid                          | 328.3206 | 1.17  | 0.004 | 0.046 | 23.33 | 3.794639 | Severe   | Mild     |
| 50 | PC(18:0_22:0)                            | 810.6659 | 5.33  | 0.005 | 0.061 | 25.23 | 4.977429 | Severe   | Mild     |
| 51 | Uric acid                                | 167.0213 | 0.9   | 0.005 | 0.053 | 7.69  | 2.567799 | Severe   | Mild     |
| 52 | LysoPE(16:0)                             | 474.2614 | 9.36  | 0.005 | 0.056 | 15.79 | 2.851689 | Mild     | Severe   |
| 53 | MG(22:5)                                 | 387.2899 | 1.15  | 0.005 | 0.05  | 15.86 | 2.166352 | Mild     | Moderate |
| 54 | LysoPC(20:0)                             | 534.3909 | 7.44  | 0.005 | 0.05  | 9.86  | 2.025302 | Severe   | Mild     |
| 55 | 12(13)Ep-9-KODE                          | 309.2062 | 8.06  | 0.006 | 0.06  | 17.48 | 4.598785 | Moderate | Mild     |
| 56 | DG(16:0_18:3)                            | 613.4747 | 1.01  | 0.006 | 0.06  | 24.91 | 19.71766 | Moderate | Mild     |
| 57 | Indoleacrylic acid                       | 188.0712 | 5.65  | 0.006 | 0.06  | 16.79 | 3.795498 | Moderate | Mild     |
| 58 | LysoPC (O-18:0)                          | 544.3519 | 9.93  | 0.007 | 0.066 | 25.61 | 2.809086 | Moderate | Mild     |
| 59 | Calcidiol                                | 383.3333 | 1.05  | 0.007 | 0.063 | 23.56 | 2.617499 | Severe   | Mild     |
| 60 | LysoPC(24:0)                             | 590.4546 | 7.24  | 0.008 | 0.067 | 25.1  | 2.103318 | Severe   | Mild     |
| 61 | MG(20:2)                                 | 383.3146 | 17.36 | 0.009 | 0.089 | 15.28 | 4.055714 | Severe   | Mild     |
| 62 | Vitamin D3                               | 367.3377 | 1.01  | 0.009 | 0.074 | 24.71 | 2.098275 | Severe   | Mild     |

**Supplemental Table S6:** Significant ( $p < 0.01$ ) compounds identified by grading AS severity as mild, moderate and severe based on echocardiography calcification score (C-Score).

| Sl.No | Metabolites/Lipids                  | <i>m/z</i> | RT    | Anova (p) | q Value  | CV%   | Max Fold Change | Highest Mean | Lowest Mean |
|-------|-------------------------------------|------------|-------|-----------|----------|-------|-----------------|--------------|-------------|
| 1     | LysoPE(22:6)                        | 526.2909   | 7.83  | 4.33E-07  | 9.90E-04 | 10.8  | 2.626279        | Mild         | Severe      |
| 2     | PC(p-18:1_22:1)                     | 843.6963   | 5.47  | 2.71E-06  | 0.002    | 19.86 | 2.818635        | Severe       | Mild        |
| 3     | MG(20:4)                            | 361.2742   | 5.56  | 9.54E-05  | 0.028    | 11.9  | 2.662581        | Mild         | Severe      |
| 4     | MG(22:6)                            | 385.2736   | 5.52  | 2.27E-04  | 0.044    | 27.77 | 2.56416         | Mild         | Severe      |
| 5     | 5-hydroxyoct-5-enoylglycine         | 180.1023   | 7.53  | 2.66E-04  | 0.046    | 23.64 | 8.594037        | Moderate     | Mild        |
| 6     | Cholesterol                         | 425.3172   | 10.13 | 4.33E-04  | 0.032    | 11.55 | 2.43956         | Mild         | Severe      |
| 7     | MG(22:4)                            | 389.3046   | 5.5   | 4.92E-04  | 0.063    | 26.51 | 2.587006        | Mild         | Severe      |
| 8     | 9,10-Epoxyoctadecenoic acid         | 295.2276   | 8.7   | 8.05E-04  | 0.041    | 14.85 | 2.20761         | Severe       | Mild        |
| 9     | MG(24:1)                            | 421.3675   | 12.24 | 0.002     | 0.066    | 14.03 | 2.388216        | Moderate     | Mild        |
| 10    | Angiotensin II                      | 1063.569   | 12.01 | 0.002     | 0.125    | 22.98 | 3.386798        | Severe       | Mild        |
| 11    | Deoxy pyridinoline                  | 413.2037   | 11.61 | 0.003     | 0.093    | 20.3  | 3.305308        | Severe       | Mild        |
| 12    | LysoPC(18:3)                        | 518.3264   | 11.43 | 0.003     | 0.094    | 29.79 | 3.844012        | Severe       | Mild        |
| 13    | MG(22:5)                            | 387.2884   | 5.55  | 0.003     | 0.137    | 19.79 | 2.815981        | Mild         | Severe      |
| 14    | Cortolone-3-glucuronide             | 541.2644   | 4.45  | 0.004     | 0.099    | 16.04 | 2.413344        | Moderate     | Mild        |
| 15    | PI(16:0_18:0)                       | 877.5197   | 5.76  | 0.005     | 0.113    | 13.55 | 4.274982        | Moderate     | Mild        |
| 16    | Tetrahydroaldosterone-3-glucuronide | 539.2488   | 4.56  | 0.005     | 0.109    | 28.58 | 2.236596        | Severe       | Mild        |
| 17    | DG(16:0_18:3)                       | 613.4747   | 1.01  | 0.005     | 0.187    | 24.91 | 6.637334        | Severe       | Mild        |
| 18    | Serylproline                        | 201.0872   | 1.05  | 0.009     | 0.149    | 19.16 | 2.545037        | Mild         | Severe      |
| 19    | Uroporphyrin III                    | 831.2429   | 12.24 | 0.01      | 0.249    | 24.87 | 2.33145         | Severe       | Mild        |

**Supplemental Table S7:** Comprehensive list of significant ( $p < 0.01$ ) compounds identified by grading AS severity as mild, moderate and severe based on mean pressure gradient (MPG), aortic valve area (AVA) and calcification score (C-Score)

| Sl.No | Mode <sup>a</sup> | Metabolites/Lipids      | <i>m/z</i> | RT    | Adducts                       | Formula                                                         | Score <sup>b</sup> | Mass Error (ppm) | Isotope similarity <sup>c</sup> |
|-------|-------------------|-------------------------|------------|-------|-------------------------------|-----------------------------------------------------------------|--------------------|------------------|---------------------------------|
| 1*    | HILIC +           | Indoleacrylic acid*     | 188.0712   | 5.65  | M+H-H <sub>2</sub> O, M+H     | C <sub>11</sub> H <sub>9</sub> NO <sub>2</sub>                  | 50.4               | -1.13            | 94.61                           |
| 2     | HILIC +           | Uracil                  | 77.0124    | 1.15  | M+H-2H <sub>2</sub> O         | C <sub>4</sub> H <sub>4</sub> N <sub>2</sub> O <sub>2</sub>     | 35.4               | -8.82            | 86.64                           |
| 3     | HILIC +           | Tryptamine              | 178.1349   | 4.37  | M+NH <sub>4</sub>             | C <sub>10</sub> H <sub>12</sub> N <sub>2</sub>                  | 38                 | 6.56             | 97.47                           |
| 4     | HILIC +           | Ketoleucine             | 95.049     | 1.14  | M+H-2H <sub>2</sub> O         | C <sub>6</sub> H <sub>10</sub> O <sub>3</sub>                   | 38.3               | -1.32            | 93.14                           |
| 5*    | HILIC +           | Tetrahydrocortisone*    | 387.2157   | 1.14  | M+Na                          | C <sub>21</sub> H <sub>32</sub> O <sub>5</sub>                  | 35.2               | 4.09             | 79.65                           |
| 6     | HILIC +           | Phenylacetaldehyde      | 121.0647   | 1.15  | M+H                           | C <sub>8</sub> H <sub>8</sub> O                                 | 38.6               | -0.69            | 93.91                           |
| 7     | HILIC +           | PC(22:6_p-18:0)         | 835.6387   | 12.24 | M+NH <sub>4</sub>             | C <sub>48</sub> H <sub>84</sub> N <sub>0</sub> O <sub>7</sub> P | 30.5               | 7.69             | 61.08                           |
| 8     | HILIC +           | Palmitic amide          | 256.2631   | 1.14  | M+H                           | C <sub>16</sub> H <sub>33</sub> NO                              | 37.6               | -1.50            | 89.96                           |
| 9     | HILIC +           | 2,4-Dimethylfuran       | 119.0487   | 1.14  | M+H-H <sub>2</sub> O,<br>M+Na | C <sub>6</sub> H <sub>8</sub> O                                 | 38.9               | -1.78            | 96.46                           |
| 10*   | HILIC +           | CMPF*                   | 263.0885   | 1.14  | M+Na                          | C <sub>12</sub> H <sub>16</sub> O <sub>5</sub>                  | 38.7               | -1.89            | 93.96                           |
| 11    | HILIC +           | Uroporphyrin III        | 831.2429   | 12.24 | M+H                           | C <sub>40</sub> H <sub>38</sub> N <sub>4</sub> O <sub>16</sub>  | 31.8               | 8.82             | 68.50                           |
| 12    | HILIC +           | Angiotensin II          | 1063.569   | 12.01 | M+NH <sub>4</sub>             | C <sub>50</sub> H <sub>71</sub> N <sub>13</sub> O <sub>12</sub> | 31.7               | 0.72             | 59.40                           |
| 13    | HILIC +           | MG(22:5)                | 387.2899   | 1.15  | M+H-H <sub>2</sub> O          | C <sub>25</sub> H <sub>40</sub> O <sub>4</sub>                  | 41.5               | 1.21             | 78.71                           |
| 14*   | HILIC +           | MG(15:0)*               | 299.2602   | 1.08  | M+H-H <sub>2</sub> O          | C <sub>18</sub> H <sub>36</sub> O <sub>4</sub>                  | 35.9               | 6.87             | 85.62                           |
| 15*   | HILIC +           | Linoleoyl ethanolamide* | 324.2893   | 1.17  | M+H-H <sub>2</sub> O, M+H     | C <sub>20</sub> H <sub>37</sub> N <sub>0</sub> O <sub>2</sub>   | 38.5               | -1.11            | 93.92                           |
| 16    | HILIC +           | LysoPC(24:0)            | 590.4546   | 7.24  | M+H-H <sub>2</sub> O          | C <sub>32</sub> H <sub>66</sub> N <sub>0</sub> O <sub>7</sub> P | 37                 | 0.40             | 85.57                           |
| 17*   | HILIC +           | LysoPC(20:0)*           | 534.3909   | 7.44  | M+H-H <sub>2</sub> O          | C <sub>28</sub> H <sub>58</sub> N <sub>0</sub> O <sub>7</sub> P | 47                 | -1.63            | 82.98                           |
| 18*   | HILIC +           | Calcidiol*              | 383.3333   | 1.05  | M+H-H <sub>2</sub> O          | C <sub>27</sub> H <sub>44</sub> O <sub>2</sub>                  | 39.9               | 6.19             | 80.48                           |
| 19*   | HILIC +           | Vitamin D3*             | 367.3377   | 1.01  | M+H-H <sub>2</sub> O          | C <sub>27</sub> H <sub>44</sub> O                               | 54                 | 4.63             | 94.51                           |
| 20    | HILIC +           | MG(20:5)                | 394.295    | 5.66  | M+NH <sub>4</sub>             | C <sub>23</sub> H <sub>36</sub> O <sub>4</sub>                  | 37.7               | -0.62            | 89.08                           |
| 21    | HILIC +           | Eicosenoic acid         | 328.3206   | 1.17  | M+NH <sub>4</sub>             | C <sub>20</sub> H <sub>38</sub> O <sub>2</sub>                  | 37.5               | -1.39            | 89.41                           |

|     |         |                                  |          |       |                     |              |      |       |       |
|-----|---------|----------------------------------|----------|-------|---------------------|--------------|------|-------|-------|
| 22  | HILIC + | 2-Phenylethanol                  | 105.07   | 1.14  | M+H-H2O             | C8H10O       | 38.8 | 1.40  | 95.84 |
| 23  | HILIC + | SM C16:1                         | 680.5661 | 1.09  | M+H-2H2O            | C40H80N2O6P+ | 34.4 | 6.41  | 79.03 |
| 24  | HILIC + | 2-Methylacetophenone             | 440.2679 | 0.84  | M+H, M+NH4,<br>M+Na | C20H38O7S    | 37.3 | 0.53  | 87.21 |
| 25* | HILIC + | DG(16:0_18:3)*                   | 613.4747 | 1.01  | M+Na                | C37H66O5     | 41   | -9.46 | 81.72 |
| 26  | HILIC + | MG(20:4)                         | 361.2742 | 5.56  | M+H-H2O             | C23H38O4     | 38.1 | 1.39  | 92.33 |
| 27  | HILIC + | MG(22:6)                         | 385.2736 | 5.52  | M+H-H2O,<br>M+NH4   | C25H38O4     | 37.4 | -0.28 | 87.52 |
| 28* | HILIC + | 5-hydroxyoct-<br>5-enoylglycine* | 180.1023 | 7.53  | M+H-2H2O            | C10H17NO4    | 57.7 | 1.64  | 93.17 |
| 29  | HILIC + | MG(22:4)                         | 389.3046 | 5.5   | M+H-H2O             | C25H42O4     | 37   | -1.13 | 86.52 |
| 30  | RP -    | N-Methyl-lysine                  | 319.2322 | 12.11 | 2M-H                | C7H16N2O2    | 36   | -9.10 | 89.85 |
| 31  | RP -    | 5,6-Epoxy-eicosatrienoic acid    | 319.2275 | 9.17  | M-H                 | C20H32O3     | 38.4 | -1.20 | 93.36 |
| 32* | RP -    | 5-AMMU*                          | 179.0566 | 3.01  | M-H2O-H             | C7H10N4O3    | 55.9 | -4.51 | 94.47 |
| 33  | RP -    | 15-Hydroxyeicosatrienoate        | 321.2421 | 9.16  | M-H2O-H, M-H        | C20H34O3     | 36   | -4.68 | 85.25 |
| 34  | RP -    | Enterodiol                       | 283.136  | 7.52  | M-H2O-H             | C18H22O4     | 36   | 6.87  | 87.73 |
| 35  | RP -    | Linalyl oxide                    | 339.2524 | 10.72 | 2M-H                | C10H18O2     | 37.4 | -4.85 | 92.63 |
| 36  | RP -    | MG(24:1)                         | 421.3675 | 12.24 | M-H2O-H             | C27H52O4     | 36.2 | -2.75 | 84.26 |
| 37  | RP +    | PI(16:0_18:0)                    | 877.5197 | 5.76  | M+K                 | C43H83O13P   | 32.9 | -0.66 | 65.23 |
| 38  | RP +    | LysoPE(18:2)                     | 478.2883 | 7.78  | M+H, M+Na           | C23H44NO7P   | 35.6 | -9.48 | 88.16 |
| 39* | RP +    | Cholic acid*                     | 447.2544 | 13.82 | M+K                 | C24H40O5     | 34.3 | 8.98  | 81.26 |
| 40  | RP +    | Pyridinoline                     | 393.1761 | 6.68  | M+H-2H2O            | C18H28N4O8   | 36.7 | -1.82 | 85.49 |
| 41  | RP +    | PC(18:0_22:0)                    | 810.6659 | 5.33  | M+H-2H2O            | C48H96NO8P   | 30.1 | -9.01 | 60.27 |
| 42  | RP +    | MG(20:1)                         | 385.333  | 15.16 | M+H                 | C23H44O4     | 36.8 | 4.65  | 89.53 |
| 43  | RP +    | Deoxypyridinoline                | 430.2334 | 4.18  | M+NH4               | C18H28N4O7   | 36   | 9.26  | 89.98 |
| 44  | RP +    | PC(p-18:1_22:1)                  | 843.6963 | 5.47  | M+NH4               | C48H92NO7P   | 32   | 1.67  | 62.14 |
| 45  | RP -    | LysoPA(16:0)                     | 391.2248 | 13.14 | M-H2O-H             | C19H39O7P    | 37.5 | -1.82 | 89.45 |
| 46* | RP -    | Glycocholic acid*                | 464.3014 | 5.7   | M-H2O-H             | C26H43NO6    | 55.5 | -2.59 | 87.60 |

|     |      |                                      |          |       |              |            |      |       |       |
|-----|------|--------------------------------------|----------|-------|--------------|------------|------|-------|-------|
| 47* | RP - | Docosatrienoic acid*                 | 333.2789 | 12.97 | M-H          | C22H38O2   | 40.5 | -2.89 | 87.87 |
| 48* | RP - | Glycoursodeoxycholic acid*           | 448.3071 | 6.73  | M-H          | C26H43NO5  | 58.6 | 0.53  | 95.10 |
| 49  | RP - | Cholenic acid                        | 355.2638 | 11.89 | M-H2O-H      | C24H38O3   | 37   | -1.31 | 86.65 |
| 50  | RP - | MG(20:3)                             | 417.24   | 13.52 | M+K-2H       | C23H40O4   | 35.9 | -3.30 | 83.41 |
| 51  | RP - | Nutriacholic acid                    | 411.2505 | 11.45 | M+Na-2H      | C24H38O4   | 37.9 | -3.11 | 93.17 |
| 52  | RP - | Uric acid                            | 167.0213 | 0.9   | M-H          | C5H4N4O3   | 39.5 | 1.28  | 98.88 |
| 53* | RP - | LysoPE(16:0)*                        | 474.2614 | 9.36  | M+Na-2H      | C21H44NO7P | 57.2 | 2.62  | 92.07 |
| 54* | RP - | 12(13)Ep-9-KODE*                     | 309.2062 | 8.06  | M-H          | C18H30O4   | 38.6 | -3.05 | 91.26 |
| 55* | RP - | LysoPC(O-18:0)*                      | 544.3519 | 9.93  | M+Cl         | C26H56NO6P | 51.1 | -3.90 | 81.56 |
| 56  | RP - | Dodecanoylcarnitine                  | 342.2646 | 9.73  | M-H          | C19H37NO4  | 37.9 | -1.09 | 90.88 |
| 57  | RP - | $\alpha$ -CEHC                       | 277.1431 | 8.21  | M-H          | C16H22O4   | 37.3 | -5.10 | 92.20 |
| 58* | RP - | APGPR Enterostatin*                  | 477.261  | 9.34  | M-H2O-H      | C21H36N8O6 | 39.1 | 6.13  | 87.77 |
| 59* | RP - | 13-Hydroxyoctadecadienoic acid*      | 295.2283 | 8.57  | M-H2O-H, M-H | C18H32O3   | 58.7 | 0.29  | 95.33 |
| 60  | RP - | PE(16:0_18:0)                        | 419.3516 | 14.03 | M-H          | C27H48O3   | 36.2 | -3.60 | 85.02 |
| 61  | RP - | Androsterone sulfate                 | 369.1734 | 6.58  | M-H          | C19H30O5S  | 36.8 | -1.93 | 86.25 |
| 62  | RP - | 3A,7 $\alpha$ -dihydroxycoprostanate | 433.3318 | 12.17 | M-H          | C27H46O4   | 38   | -1.25 | 91.66 |
| 63* | RP - | 9,10-Epoxyoctadecenoic acid*         | 295.2276 | 8.7   | M-H2O-H, M-H | C18H32O3   | 39.8 | -0.53 | 93.64 |
| 64  | RP - | Cortolone-3-glucuronide              | 541.2644 | 4.45  | M-H          | C27H42O11  | 36.9 | -1.96 | 86.87 |
| 65  | RP - | Tetrahydroaldosterone-3-glucuronide  | 539.2488 | 4.56  | M-H          | C27H40O11  | 36.9 | -1.77 | 86.87 |
| 66* | RP - | Serylproline*                        | 201.0872 | 1.05  | M-H          | C8H14N2O4  | 51.5 | -4.27 | 92.48 |
| 67  | RP + | LysoPC(22:0)                         | 562.4207 | 11.81 | M+H-H2O      | C30H62NO7P | 36.2 | -4.23 | 85.84 |
| 68  | RP + | MG(20:2)                             | 383.3146 | 17.36 | M+H          | C23H42O4   | 37.9 | -2.71 | 92.57 |
| 69  | RP + | LysoPA(18:2)                         | 399.2274 | 12.48 | M+H-2H2O     | C21H39O7P  | 36   | -4.79 | 85.36 |
| 70* | RP + | LysoPE(22:6)*                        | 526.2909 | 7.83  | M+H          | C27H44NO7P | 37.5 | -3.71 | 90.16 |

|    |      |              |          |       |     |            |      |       |       |
|----|------|--------------|----------|-------|-----|------------|------|-------|-------|
| 71 | RP + | LysoPC(18:3) | 518.3264 | 11.43 | M+H | C26H48NO7P | 36.7 | 4.33  | 88.46 |
| 72 | RP + | Cholesterol  | 425.3172 | 10.13 | M+K | C27H46O    | 36.6 | -2.17 | 85.48 |

\*These compounds are identified by matching the experimental fragmentation data with theoretical fragmentation patterns generated by the simulated breaking of bonds in the structures of possible identifications.

<sup>a</sup>HILIC+ Hydrophilic interaction liquid chromatography separation in electrospray ionization (ESI) positive mode

<sup>a</sup>HILIC- Hydrophilic interaction liquid chromatography separation in ESI negative mode

<sup>a</sup>RP+ Reversed-phase liquid chromatography separation in ESI positive mode

<sup>a</sup>RP- Reversed-phase liquid chromatography separation in ESI negative mode

<sup>b</sup>Scores in Progenesis QI are calculated using the mean of three similarity metrics namely (1) Mass Similarity, (2) Isotope Similarity, and (3) Fragmentation Score.

<sup>c</sup>Isotope similarity compares the intensities of each isotope between observed and theoretical distributions.



| <b>Supplemental Table S9:</b> Tentatively identified metabolites/lipids with CV<30% in QC samples (Sorted by CV %) |                                     |                  |                           |                |      |
|--------------------------------------------------------------------------------------------------------------------|-------------------------------------|------------------|---------------------------|----------------|------|
| Sl.No                                                                                                              | Compound name                       | Accepted HMDB ID | RT- <i>m/z</i> pair       | Chromatography | CV%  |
| 1                                                                                                                  | Panose                              | HMDB0029937      | 0.73_504.1702n            | RP ESI-        | 4.42 |
| 2                                                                                                                  | LysoPC(18:0)                        | HMDB0010384      | 9.60_523.3658n            | RP ESI+        | 4.91 |
| 3                                                                                                                  | Maltotetraose                       | HMDB0001296      | 0.73_666.2218n            | RP ESI-        | 5.23 |
| 4                                                                                                                  | LysoPC(16:0)                        | HMDB0010382      | 8.16_495.3325n            | RP ESI+        | 5.35 |
| 5                                                                                                                  | LysoPC(18:1)                        | HMDB0002815      | 8.69_521.3441n            | RP ESI+        | 5.39 |
| 6                                                                                                                  | LysoPC(20:4)                        | HMDB0010396      | 8.01_543.3353n            | RP ESI+        | 5.42 |
| 7                                                                                                                  | 1-Stearoylglycerophosphocholine     | HMDB0094688      | 9.34_525.3761 <i>m/z</i>  | RP ESI+        | 5.44 |
| 8                                                                                                                  | Stearoylcarnitine                   | HMDB0000848      | 9.92_464.3171 <i>m/z</i>  | RP ESI-        | 5.44 |
| 9                                                                                                                  | LysoPE(20:0)                        | HMDB0011511      | 8.96_509.3492n            | RP ESI+        | 5.46 |
| 10                                                                                                                 | LysoPC(20:3)                        | HMDB0010393      | 8.42_545.3496n            | RP ESI+        | 5.54 |
| 11                                                                                                                 | N-Palmitoylsphingosine              | HMDB0000790      | 9.58_582.5077 <i>m/z</i>  | RP ESI-        | 5.56 |
| 12                                                                                                                 | LysoPC(18:2)                        | HMDB0010386      | 7.99_519.3336n            | RP ESI+        | 5.58 |
| 13                                                                                                                 | MG(18:0)                            | HMDB0011131      | 9.54_341.3044 <i>m/z</i>  | RP ESI+        | 5.65 |
| 14                                                                                                                 | LysoPC(14:0)                        | HMDB0010379      | 7.30_467.2986n            | RP ESI+        | 5.82 |
| 15                                                                                                                 | LysoPC(P-18:0)                      | HMDB0013122      | 9.98_507.3665n            | RP ESI+        | 5.94 |
| 16                                                                                                                 | PC(P-18:1_P-18:1)                   | HMDB0011300      | 2.24_792.5688 <i>m/z</i>  | HILIC ESI+     | 6.15 |
| 17                                                                                                                 | LysoPC(P-16:0)                      | HMDB0010407      | 8.70_479.3360n            | RP ESI+        | 6.19 |
| 18                                                                                                                 | LysoPC(22:4)                        | HMDB0010401      | 8.87_571.3647n            | RP ESI+        | 6.26 |
| 19                                                                                                                 | Docosahexaenoic acid                | HMDB0062579      | 11.04_327.2345 <i>m/z</i> | RP ESI-        | 6.28 |
| 20                                                                                                                 | LysoPE(18:1)                        | HMDB0011475      | 8.42_478.2946 <i>m/z</i>  | RP ESI-        | 6.31 |
| 21                                                                                                                 | 1,1'-Oxybis[2,4-dibromobenzene]     | HMDB0037547      | 8.65_482.7197 <i>m/z</i>  | RP ESI+        | 6.52 |
| 22                                                                                                                 | 4-(1,1,3,3-Tetramethylbutyl)-phenol | HMDB0013825      | 1.04_205.1600 <i>m/z</i>  | HILIC ESI-     | 6.6  |
| 23                                                                                                                 | LysoPE(18:0)                        | HMDB0011130      | 9.28_480.3111 <i>m/z</i>  | RP ESI-        | 6.61 |
| 24                                                                                                                 | LysoPC(20:2)                        | HMDB0010392      | 9.01_547.3646n            | RP ESI+        | 6.67 |
| 25                                                                                                                 | Indane                              | HMDB0059837      | 1.13_118.0789n            | HILIC ESI+     | 6.71 |
| 26                                                                                                                 | Vitamin K1                          | HMDB0003555      | 10.26_450.3534n           | RP ESI+        | 6.75 |

|    |                                 |             |                   |            |      |
|----|---------------------------------|-------------|-------------------|------------|------|
| 27 | 3-hydroxyhexadecanoyl carnitine | HMDB0061642 | 9.26_450.2985m/z  | RP ESI-    | 6.8  |
| 28 | LysoPC(16:1)                    | HMDB0010383 | 7.61_493.3146n    | RP ESI+    | 6.85 |
| 29 | Eicosatrienoic acid             | HMDB0002925 | 12.11_305.2486m/z | RP ESI-    | 6.86 |
| 30 | Campesterol                     | HMDB0002869 | 10.33_439.3343m/z | RP ESI+    | 6.88 |
| 31 | LysoPC(20:1)                    | HMDB0010391 | 9.85_549.3802n    | RP ESI+    | 6.96 |
| 32 | LysoPC(20:4)                    | HMDB0010395 | 7.31_544.3419m/z  | HILIC ESI+ | 6.97 |
| 33 | Phenylacetaldehyde              | HMDB0006236 | 1.15_121.0647m/z  | HILIC ESI+ | 7.04 |
| 34 | 2-Octenal                       | HMDB0030961 | 4.94_171.1017m/z  | RP ESI-    | 7.05 |
| 35 | LysoPC(20:5)                    | HMDB0010397 | 7.50_542.3232m/z  | RP ESI+    | 7.12 |
| 36 | LysoPE(18:1)                    | HMDB0011505 | 8.60_478.2960m/z  | RP ESI-    | 7.14 |
| 37 | LysoPC(22:6)                    | HMDB0010404 | 7.99_567.3340n    | RP ESI+    | 7.15 |
| 38 | 5Tetrahydrocortisol             | HMDB0000526 | 0.94_405.2046m/z  | RP ESI+    | 7.34 |
| 39 | N-Methyl-lysine                 | HMDB0002038 | 12.11_319.2322m/z | RP ESI-    | 7.34 |
| 40 | Pentadecanal                    | HMDB0031078 | 10.56_226.2278n   | RP ESI-    | 7.35 |
| 41 | 10-Nonadecenoic acid            | HMDB0013622 | 11.33_341.2694m/z | RP ESI-    | 7.38 |
| 42 | GammTocopherol                  | HMDB0001492 | 10.00_455.3309m/z | RP ESI+    | 7.45 |
| 43 | PE(20:3_P-18:0)                 | HMDB0009346 | 0.63_753.5645n    | RP ESI+    | 7.46 |
| 44 | 2-Pentylthiophene               | HMDB0040240 | 6.88_307.1551m/z  | RP ESI-    | 7.5  |
| 45 | Leukotriene D4                  | HMDB0003080 | 0.54_533.2092m/z  | RP ESI-    | 7.63 |
| 46 | Uric acid                       | HMDB0000289 | 0.90_167.0213m/z  | RP ESI-    | 7.69 |
| 47 | Valyl-Aspartate                 | HMDB0029123 | 6.02_269.0544m/z  | RP ESI-    | 7.76 |
| 48 | LysoPC(22:5)                    | HMDB0010402 | 8.27_569.3496n    | RP ESI+    | 7.79 |
| 49 | m-Cresol                        | HMDB0002048 | 1.14_91.0541m/z   | HILIC ESI+ | 7.81 |
| 50 | Capric acid                     | HMDB0000511 | 7.98_171.1390m/z  | RP ESI-    | 7.83 |
| 51 | LysoPE(16:0)                    | HMDB0011503 | 9.24_452.2799m/z  | RP ESI-    | 7.83 |
| 52 | (E)-4-Methyl-2-heptene          | HMDB0061910 | 7.30_157.1234m/z  | RP ESI-    | 7.86 |
| 53 | LysoPC(15:0)                    | HMDB0010381 | 7.45_481.3185n    | HILIC ESI+ | 7.89 |
| 54 | Ketoleucine                     | HMDB0000695 | 1.14_95.0490m/z   | HILIC ESI+ | 7.91 |
| 55 | 1,3,5-Trimethoxybenzene         | HMDB0059963 | 6.68_335.1494m/z  | RP ESI-    | 7.94 |
| 56 | LysoPE(p-16:0)                  | HMDB0011152 | 8.63_437.2935n    | RP ESI-    | 8.07 |

|    |                                                      |             |                   |            |      |
|----|------------------------------------------------------|-------------|-------------------|------------|------|
| 57 | Octyl 4-methoxycinnamic acid                         | HMDB0061861 | 10.93_335.1890m/z | RP ESI-    | 8.13 |
| 58 | Histidinyl-Valine                                    | HMDB0028898 | 0.73_291.0855m/z  | RP ESI-    | 8.17 |
| 59 | LysoPC(18:1)                                         | HMDB0010385 | 8.70_521.3476n    | RP ESI+    | 8.22 |
| 60 | Arabinosylhypoxanthine                               | HMDB0003040 | 2.41_267.0742m/z  | RP ESI-    | 8.23 |
| 61 | Isopimaric acid                                      | HMDB0036811 | 10.52_301.2174m/z | RP ESI-    | 8.23 |
| 62 | N-Acetyl-leucine                                     | HMDB0011756 | 3.42_172.0975m/z  | RP ESI-    | 8.45 |
| 63 | LysoPC(P-18:1)                                       | HMDB0010408 | 9.01_506.3574m/z  | RP ESI+    | 8.47 |
| 64 | LysoPC(17:0)                                         | HMDB0012108 | 7.33_509.3514n    | HILIC ESI+ | 8.49 |
| 65 | Linoleic acid                                        | HMDB0000673 | 1.08_263.2365m/z  | HILIC ESI+ | 8.77 |
| 66 | PC(14:0_18:4)                                        | HMDB0007877 | 12.03_708.4905m/z | RP ESI+    | 8.78 |
| 67 | Hypogeic acid                                        | HMDB0002186 | 11.04_253.2179m/z | RP ESI-    | 8.89 |
| 68 | Chenodeoxycholic acid 3-sulfate                      | HMDB0002586 | 6.71_507.2234m/z  | RP ESI-    | 8.9  |
| 69 | 5b-Cholestane-3a,7a,12a,23S,25-pentol                | HMDB0000483 | 1.11_417.3356m/z  | HILIC ESI+ | 8.95 |
| 70 | Docosapentaenoic acid                                | HMDB0001976 | 11.45_329.2495m/z | RP ESI-    | 8.99 |
| 71 | Heptaethylene glycol                                 | HMDB0061835 | 11.25_325.1864m/z | RP ESI-    | 9    |
| 72 | 2-Hexyl-3-phenyl-2-propenal                          | HMDB0031736 | 7.32_261.1490m/z  | RP ESI-    | 9.01 |
| 73 | 11-Dehydro-thromboxane B2                            | HMDB0004242 | 11.97_349.2052m/z | RP ESI-    | 9.07 |
| 74 | Fexofenadine                                         | HMDB0005030 | 7.83_501.2834n    | RP ESI+    | 9.08 |
| 75 | Hypoxanthine                                         | HMDB0000157 | 0.90_135.0307m/z  | RP ESI-    | 9.08 |
| 76 | Oleoylcarnitine                                      | HMDB0005065 | 5.46_448.3421m/z  | HILIC ESI+ | 9.2  |
| 77 | 1-(2,6,6-Trimethyl-1-cyclohexen-1-yl)-1-penten-3-one | HMDB0038130 | 9.41_205.1604m/z  | RP ESI-    | 9.22 |
| 78 | Adenosine triphosphate                               | HMDB0000538 | 9.34_525.0331m/z  | RP ESI+    | 9.43 |
| 79 | Phthalic acid                                        | HMDB0002107 | 1.04_149.0240m/z  | HILIC ESI+ | 9.47 |
| 80 | 1,1-Dimethylbiguanide                                | HMDB0001921 | 2.56_164.0711m/z  | RP ESI-    | 9.49 |
| 81 | 6-Phenylundecane                                     | HMDB0061857 | 10.61_277.2175m/z | RP ESI-    | 9.5  |
| 82 | 2,4-Dimethylfuran                                    | HMDB0032965 | 1.14_96.0573n     | HILIC ESI+ | 9.52 |
| 83 | 11b-PGE2                                             | HMDB0060041 | 11.45_397.2263m/z | RP ESI-    | 9.61 |
| 84 | 2-Aminoheptanoate                                    | HMDB0094649 | 10.39_184.0748m/z | HILIC ESI+ | 9.67 |
| 85 | Glycogen                                             | HMDB0000757 | 7.77_689.2099m/z  | HILIC ESI+ | 9.7  |

|     |                                                                |             |                   |            |       |
|-----|----------------------------------------------------------------|-------------|-------------------|------------|-------|
| 86  | 4-Hydroxy-5-(dihydroxyphenyl)-valeric acid-O-methyl-O-sulphate | HMDB0059977 | 0.59_336.0547n    | RP ESI-    | 9.79  |
| 87  | LysoPC(22:1)                                                   | HMDB0010399 | 11.17_578.4179m/z | RP ESI+    | 9.81  |
| 88  | LysoPC(20:0)                                                   | HMDB0010390 | 7.44_534.3909m/z  | HILIC ESI+ | 9.86  |
| 89  | Oleic acid                                                     | HMDB0000207 | 1.17_282.2582n    | HILIC ESI+ | 9.87  |
| 90  | PC(o-16:1_14:1)                                                | HMDB0013410 | 10.06_688.5220m/z | RP ESI+    | 9.88  |
| 91  | Xylose                                                         | HMDB0000098 | 0.68_195.0506m/z  | RP ESI-    | 10.1  |
| 92  | Isoleucyl-Isoleucine                                           | HMDB0028910 | 0.79_265.1513m/z  | HILIC ESI- | 10.12 |
| 93  | Dodecanoic acid                                                | HMDB0000638 | 9.34_199.1712m/z  | RP ESI-    | 10.15 |
| 94  | 2-Hydroxymyristic acid                                         | HMDB0002261 | 9.73_225.1850m/z  | RP ESI-    | 10.19 |
| 95  | Hexylbenzene                                                   | HMDB0061815 | 1.35_180.1746m/z  | HILIC ESI+ | 10.19 |
| 96  | Guanosine                                                      | HMDB0000133 | 2.41_282.0842m/z  | RP ESI-    | 10.24 |
| 97  | Iso-Valeraldehyde                                              | HMDB0006478 | 10.39_104.1072m/z | HILIC ESI+ | 10.28 |
| 98  | betDamascenone                                                 | HMDB0013804 | 8.35_235.1331m/z  | RP ESI-    | 10.3  |
| 99  | Trans-urocanate                                                | HMDB0062562 | 0.54_174.9918m/z  | RP ESI-    | 10.31 |
| 100 | AlphLinolenic acid                                             | HMDB0001388 | 1.08_279.2310m/z  | HILIC ESI+ | 10.34 |
| 101 | Butanone                                                       | HMDB0000474 | 6.63_143.1070m/z  | RP ESI-    | 10.36 |
| 102 | gammGlutamylmethionine                                         | HMDB0034367 | 0.68_315.0410m/z  | RP ESI-    | 10.42 |
| 103 | Taurocholic acid                                               | HMDB0000036 | 5.37_514.2843m/z  | RP ESI-    | 10.5  |
| 104 | Myristic acid                                                  | HMDB0000806 | 10.74_227.2032m/z | RP ESI-    | 10.58 |
| 105 | Heptadecanoic acid                                             | HMDB0002259 | 1.10_269.2487m/z  | HILIC ESI- | 10.71 |
| 106 | 2-Hexenal                                                      | HMDB0031496 | 7.24_195.1391m/z  | RP ESI-    | 10.78 |
| 107 | Oenanthic ether                                                | HMDB0000798 | 7.96_315.2543m/z  | RP ESI-    | 10.78 |
| 108 | LysoPE(22:6)                                                   | HMDB0011526 | 7.83_526.2909m/z  | RP ESI+    | 10.8  |
| 109 | Undecanoic acid                                                | HMDB0000947 | 8.65_185.1539m/z  | RP ESI-    | 10.92 |
| 110 | 3-Phenyl-1-propanol                                            | HMDB0033962 | 1.17_159.0774m/z  | HILIC ESI+ | 11.04 |
| 111 | 3A,7 $\alpha$ -dihydroxycoprostanate                           | HMDB0000359 | 12.17_433.3318m/z | RP ESI-    | 11.07 |
| 112 | DG(14:0_16:1)                                                  | HMDB0007012 | 17.82_577.4229m/z | RP ESI+    | 11.11 |
| 113 | Biliverdin                                                     | HMDB0001008 | 6.42_583.2553m/z  | RP ESI+    | 11.12 |
| 114 | Ricinoleic acid                                                | HMDB0034297 | 9.02_297.2443m/z  | RP ESI-    | 11.13 |

|     |                                          |             |                   |            |       |
|-----|------------------------------------------|-------------|-------------------|------------|-------|
| 115 | trans-Hexadec-2-enoyl carnitine          | HMDB0006317 | 5.61_398.3271m/z  | HILIC ESI+ | 11.19 |
| 116 | Mono-(2-ethyl-5-carboxypentyl) phthalate | HMDB0094647 | 5.87_289.1076m/z  | RP ESI-    | 11.23 |
| 117 | TG(22:5_18:3_22:5)                       | HMDB0010548 | 2.42_999.7436m/z  | HILIC ESI+ | 11.28 |
| 118 | Glycocholic acid                         | HMDB0000138 | 5.70_464.3014m/z  | RP ESI-    | 11.29 |
| 119 | PC(18:3_14:0)                            | HMDB0008163 | 8.13_772.5138m/z  | RP ESI-    | 11.29 |
| 120 | PC(14:1_18:2)                            | HMDB0007907 | 8.36_772.5132m/z  | RP ESI-    | 11.33 |
| 121 | Leu-Leu-Leu                              | HMDB0094648 | 1.56_340.2568m/z  | HILIC ESI+ | 11.36 |
| 122 | Glycylproline                            | HMDB0000721 | 0.56_217.0821m/z  | RP ESI-    | 11.4  |
| 123 | DG(20:5_20:2)                            | HMDB0007573 | 14.83_666.5287n   | RP ESI+    | 11.46 |
| 124 | MG(18:1)                                 | HMDB0011536 | 5.62_339.2892m/z  | HILIC ESI+ | 11.46 |
| 125 | Dimethyl sulfone                         | HMDB0004983 | 0.76_187.0091m/z  | HILIC ESI- | 11.49 |
| 126 | Tetranor 12-HETE                         | HMDB0060055 | 6.78_265.1797m/z  | RP ESI-    | 11.54 |
| 127 | 1-Phenyl-2-hexanone                      | HMDB0094661 | 6.14_221.1174m/z  | RP ESI-    | 11.55 |
| 128 | Cholesterol                              | HMDB0000067 | 10.13_425.3172m/z | RP ESI+    | 11.55 |
| 129 | DG(14:0_16:0)                            | HMDB0007011 | 18.81_579.4386m/z | RP ESI+    | 11.57 |
| 130 | Trigonelline                             | HMDB0000875 | 1.19_138.0552m/z  | HILIC ESI+ | 11.62 |
| 131 | CMPF                                     | HMDB0061112 | 1.14_263.0885m/z  | HILIC ESI+ | 11.64 |
| 132 | 13-Hydroxyoctadecadienoic acid           | HMDB0004667 | 8.57_296.2352n    | RP ESI-    | 11.66 |
| 133 | 4-Hydroxynonenal                         | HMDB0004362 | 8.36_311.2217m/z  | RP ESI-    | 11.68 |
| 134 | Solanidine                               | HMDB0003236 | 7.19_398.3412m/z  | RP ESI+    | 11.68 |
| 135 | 17-Hydroxyandrostane-3-glucuronide       | HMDB0010359 | 7.86_449.2539m/z  | RP ESI-    | 11.71 |
| 136 | 6-Methyl-3,5-heptadien-2-one             | HMDB0031582 | 8.75_247.1699m/z  | RP ESI-    | 11.72 |
| 137 | Phenylethylamine                         | HMDB0012275 | 6.38_158.0377m/z  | RP ESI-    | 11.78 |
| 138 | 16-Hydroxypregnenolone                   | HMDB0000315 | 0.83_332.2338n    | HILIC ESI- | 11.9  |
| 139 | MG(20:4)                                 | HMDB0004666 | 5.56_361.2742m/z  | HILIC ESI+ | 11.9  |
| 140 | MG(14:0)                                 | HMDB0011530 | 12.46_302.2443n   | RP ESI-    | 11.94 |
| 141 | Palmitoylcarnitine                       | HMDB0000222 | 5.60_400.3457m/z  | HILIC ESI+ | 12    |
| 142 | Enterodiol                               | HMDB0005056 | 7.52_283.1360m/z  | RP ESI-    | 12.02 |
| 143 | Kynurenic acid                           | HMDB0000715 | 7.17_377.0764m/z  | RP ESI-    | 12.02 |
| 144 | lysoPC(28:0)                             | HMDB0029206 | 0.65_664.5337m/z  | RP ESI+    | 12.03 |

|     |                               |             |                   |            |       |
|-----|-------------------------------|-------------|-------------------|------------|-------|
| 145 | LysoPC(22:2)                  | HMDB0010400 | 9.18_598.3874m/z  | RP ESI+    | 12.04 |
| 146 | PE(22:1_22:2)                 | HMDB0000520 | 5.44_454.3896m/z  | HILIC ESI+ | 12.04 |
| 147 | CE(15:1)                      | HMDB0060056 | 12.12_647.5189m/z | RP ESI+    | 12.09 |
| 148 | Pyridoxine 5'-phosphate       | HMDB0001319 | 1.17_285.9887m/z  | RP ESI-    | 12.16 |
| 149 | GammButyrolactone             | HMDB0000549 | 10.39_124.9999m/z | HILIC ESI+ | 12.19 |
| 150 | SM(d18:0_22:3)                | HMDB0013468 | 2.34_819.5717m/z  | HILIC ESI+ | 12.26 |
| 151 | 5,6-Epoxy-eicosatrienoic acid | HMDB0002190 | 9.17_319.2275m/z  | RP ESI-    | 12.31 |
| 152 | gammGlutamylthreonine         | HMDB0029159 | 1.05_248.0999n    | RP ESI-    | 12.33 |
| 153 | Docosadienoic acid            | HMDB0061714 | 1.09_336.3020n    | HILIC ESI- | 12.34 |
| 154 | Atorvastatin                  | HMDB0005006 | 11.54_581.2428m/z | RP ESI+    | 12.37 |
| 155 | 1,3-Diacetylpropane           | HMDB0029165 | 3.96_127.0752m/z  | RP ESI-    | 12.42 |
| 156 | Methyl dihydrojasmonate       | HMDB0031740 | 6.51_207.1407m/z  | RP ESI-    | 12.52 |
| 157 | 2,4-Di-tert-butylphenol       | HMDB0013816 | 7.45_249.1509m/z  | RP ESI-    | 12.79 |
| 158 | N-Octyl phenyl ketone         | HMDB0094674 | 7.59_263.1661m/z  | RP ESI-    | 12.82 |
| 159 | 3-Hexanone                    | HMDB0000753 | 0.91_199.1689m/z  | HILIC ESI- | 12.94 |
| 160 | LysoPC(24:1)                  | HMDB0010406 | 12.71_605.4434n   | RP ESI+    | 12.94 |
| 161 | Prolyl-Tryptophan             | HMDB0029028 | 1.16_319.1777m/z  | HILIC ESI+ | 12.94 |
| 162 | Cyclotetradecane              | HMDB0033567 | 11.43_241.2173m/z | RP ESI-    | 12.99 |
| 163 | p-Cresol sulfate              | HMDB0011635 | 3.91_187.0078m/z  | RP ESI-    | 12.99 |
| 164 | all-trans-Retinoic acid       | HMDB0001852 | 9.81_299.2024m/z  | RP ESI-    | 13.06 |
| 165 | Diltiazem                     | HMDB0014487 | 5.09_415.1690m/z  | RP ESI+    | 13.11 |
| 166 | Saccharopine                  | HMDB0000279 | 6.69_551.2624m/z  | HILIC ESI- | 13.12 |
| 167 | (E)-3-decen-1-ol              | HMDB0013810 | 14.96_311.2960m/z | RP ESI-    | 13.14 |
| 168 | Indoxyl sulfate               | HMDB0000682 | 0.78_212.0031m/z  | HILIC ESI- | 13.2  |
| 169 | Coprocholic acid              | HMDB0000601 | 1.06_450.3337n    | HILIC ESI+ | 13.27 |
| 170 | 9E-Heptadecenoic acid         | HMDB0031046 | 11.70_267.2326m/z | RP ESI-    | 13.29 |
| 171 | Isoursodeoxycholic acid       | HMDB0000686 | 7.88_392.2925n    | RP ESI-    | 13.3  |
| 172 | LysoPA(16:0)                  | HMDB0007849 | 13.14_391.2248m/z | RP ESI-    | 13.48 |
| 173 | Deoxyuridine                  | HMDB0000012 | 1.05_273.0734m/z  | RP ESI-    | 13.49 |
| 174 | PI(16:0_18:0)                 | HMDB0009781 | 5.76_877.5197m/z  | RP ESI+    | 13.55 |

|     |                                     |             |                   |            |       |
|-----|-------------------------------------|-------------|-------------------|------------|-------|
| 175 | 25,26-dihydroxyvitamin D            | HMDB0001420 | 1.10_415.3218m/z  | HILIC ESI- | 13.57 |
| 176 | 18-Oxocortisol                      | HMDB0000332 | 0.54_375.1826m/z  | RP ESI-    | 13.63 |
| 177 | Tryptophan                          | HMDB0000929 | 2.92_203.0822m/z  | RP ESI-    | 13.69 |
| 178 | Dihydrotestosterone                 | HMDB0002961 | 0.85_290.2268n    | HILIC ESI- | 13.7  |
| 179 | 13-OxoODE                           | HMDB0004668 | 8.92_293.2115m/z  | RP ESI-    | 13.72 |
| 180 | Ubiquinone-1                        | HMDB0002012 | 7.02_231.1032m/z  | RP ESI-    | 13.72 |
| 181 | DG(22:5_16:1)                       | HMDB0007708 | 19.27_663.5005m/z | RP ESI+    | 13.73 |
| 182 | Glycoursodeoxycholic acid           | HMDB0000708 | 6.73_448.3071m/z  | RP ESI-    | 13.88 |
| 183 | 2-Butylfuran                        | HMDB0040272 | 8.40_247.1689m/z  | RP ESI-    | 13.91 |
| 184 | Serylvaline                         | HMDB0029052 | 0.58_204.1095n    | RP ESI-    | 13.91 |
| 185 | Tauroursodeoxycholic acid           | HMDB0000874 | 6.07_498.2894m/z  | RP ESI-    | 13.95 |
| 186 | Phloretin                           | HMDB0003306 | 4.83_273.0795m/z  | RP ESI-    | 13.97 |
| 187 | Dehydroepiandrosterone sulfate      | HMDB0001032 | 5.72_367.1590m/z  | RP ESI-    | 13.98 |
| 188 | DG(14:0_20:3)                       | HMDB0007023 | 20.01_613.4817m/z | RP ESI+    | 13.98 |
| 189 | MG(24:1)                            | HMDB0011559 | 12.24_421.3675m/z | RP ESI-    | 14.03 |
| 190 | Borneol                             | HMDB0034976 | 6.80_199.1332m/z  | RP ESI-    | 14.13 |
| 191 | PC(14:0_20:4)                       | HMDB0007883 | 8.67_798.5286m/z  | RP ESI-    | 14.16 |
| 192 | Scopolamine                         | HMDB0003573 | 1.13_286.1446m/z  | HILIC ESI+ | 14.18 |
| 193 | SM(d18:0_14:1(OH))                  | HMDB0013462 | 20.39_689.5191m/z | RP ESI+    | 14.18 |
| 194 | DG(16:0_20:4)                       | HMDB0007113 | 20.16_599.5048m/z | RP ESI+    | 14.21 |
| 195 | Cortol                              | HMDB0003180 | 7.07_386.2900m/z  | HILIC ESI+ | 14.24 |
| 196 | 19,20-DiHDPA                        | HMDB0010214 | 0.82_397.2148m/z  | HILIC ESI- | 14.25 |
| 197 | Dodecanoylcarnitine                 | HMDB0002250 | 9.73_342.2646m/z  | RP ESI-    | 14.28 |
| 198 | Matairesinol                        | HMDB0035789 | 0.61_357.1320m/z  | RP ESI-    | 14.33 |
| 199 | Myristoleic acid                    | HMDB0002000 | 7.34_247.1692m/z  | RP ESI-    | 14.35 |
| 200 | DG(14:0_18:2)                       | HMDB0007016 | 19.60_587.4640m/z | RP ESI+    | 14.37 |
| 201 | 1-Stearoylglycerophosphoglycerol    | HMDB0061697 | 10.59_533.2872m/z | RP ESI-    | 14.39 |
| 202 | Mono-(2-ethyl-5-oxohexyl) phthalate | HMDB0094645 | 7.02_291.1231m/z  | RP ESI-    | 14.46 |
| 203 | LysoPE(18:2)                        | HMDB0011507 | 7.78_477.2810n    | RP ESI+    | 14.52 |
| 204 | Adrenic acid                        | HMDB0002226 | 12.21_331.2659m/z | RP ESI-    | 14.53 |

|     |                             |             |                   |            |       |
|-----|-----------------------------|-------------|-------------------|------------|-------|
| 205 | Pantothenol                 | HMDB0004231 | 10.48_242.0807m/z | HILIC ESI- | 14.58 |
| 206 | Traumatic acid              | HMDB0000933 | 1.05_228.1365n    | HILIC ESI+ | 14.59 |
| 207 | Undecanal                   | HMDB0030941 | 16.64_339.3266m/z | RP ESI-    | 14.6  |
| 208 | Capryloylglycine            | HMDB0000832 | 1.14_236.1054m/z  | HILIC ESI- | 14.62 |
| 209 | LysoPE(20:2)                | HMDB0011513 | 7.33_523.3479m/z  | RP ESI+    | 14.63 |
| 210 | Hexadecanedioic acid        | HMDB0000672 | 6.56_267.1962m/z  | RP ESI-    | 14.65 |
| 211 | 1-Tridecene                 | HMDB0030930 | 1.12_227.2019m/z  | HILIC ESI- | 14.66 |
| 212 | 6-Hydroxyhexanoic acid      | HMDB0012843 | 4.88_131.0702m/z  | RP ESI-    | 14.68 |
| 213 | Phytol                      | HMDB0002019 | 11.89_341.3053m/z | RP ESI-    | 14.76 |
| 214 | 1-Phenylheptane             | HMDB0061825 | 1.14_221.1541m/z  | HILIC ESI- | 14.82 |
| 215 | 1-Phenyl-1-propanone        | HMDB0032623 | 1.13_134.0728n    | HILIC ESI+ | 14.85 |
| 216 | 9,10-Epoxyoctadecenoic acid | HMDB0004701 | 8.70_296.2350n    | RP ESI-    | 14.85 |
| 217 | Dimethylbenzimidazole       | HMDB0003701 | 8.38_291.1589m/z  | RP ESI-    | 14.99 |
| 218 | p-Xylene                    | HMDB0059924 | 1.34_124.1121m/z  | HILIC ESI+ | 15.03 |
| 219 | AlphLactose                 | HMDB0000186 | 0.71_377.0848m/z  | RP ESI-    | 15.04 |
| 220 | Pentadecanoic acid          | HMDB0000826 | 1.11_241.2168m/z  | HILIC ESI- | 15.04 |
| 221 | Desmosine                   | HMDB0000572 | 9.14_571.2880m/z  | RP ESI-    | 15.06 |
| 222 | Hexaethylene glycol         | HMDB0061822 | 1.17_283.1757m/z  | HILIC ESI+ | 15.21 |
| 223 | Undecanedioic acid          | HMDB0000888 | 5.38_216.1364n    | RP ESI-    | 15.26 |
| 224 | MG(20:1)                    | HMDB0011543 | 15.16_385.3330m/z | RP ESI+    | 15.28 |
| 225 | 2-Methoxyestrone            | HMDB0000010 | 5.95_300.1724n    | RP ESI-    | 15.31 |
| 226 | Octanoylcarnitine           | HMDB0000791 | 5.70_268.1932m/z  | RP ESI-    | 15.31 |
| 227 | DG(22:6_22:6)               | HMDB0007788 | 8.63_677.4905m/z  | RP ESI+    | 15.35 |
| 228 | Nutriacholic acid           | HMDB0000467 | 11.45_411.2505m/z | RP ESI-    | 15.4  |
| 229 | Azelaic acid                | HMDB0000784 | 4.42_187.0976m/z  | RP ESI-    | 15.46 |
| 230 | Histidine                   | HMDB0000177 | 7.24_154.0624m/z  | RP ESI-    | 15.46 |
| 231 | alphTerpineol acetate       | HMDB0032051 | 16.69_241.1433m/z | RP ESI-    | 15.51 |
| 232 | Linoleoyl ethanolamide      | HMDB0012252 | 1.17_323.2821n    | HILIC ESI+ | 15.53 |
| 233 | SM(d18:0_16:1(OH))          | HMDB0013463 | 12.85_699.5490m/z | RP ESI+    | 15.54 |
| 234 | 2-Nonadecanone              | HMDB0061862 | 12.11_327.2901m/z | RP ESI-    | 15.57 |



|     |                                |             |                   |            |       |
|-----|--------------------------------|-------------|-------------------|------------|-------|
| 235 | Histidinol                     | HMDB0003431 | 9.34_281.1724m/z  | RP ESI-    | 15.58 |
| 236 | Raffinose                      | HMDB0003213 | 6.98_527.1582m/z  | HILIC ESI+ | 15.58 |
| 237 | Tetrahydrocorticosterone       | HMDB0000268 | 5.77_368.2797m/z  | HILIC ESI+ | 15.59 |
| 238 | 4-Hydroxybenzoic acid          | HMDB0000500 | 1.04_121.0282m/z  | HILIC ESI+ | 15.6  |
| 239 | Phosphate                      | HMDB0001429 | 10.39_98.9834m/z  | HILIC ESI+ | 15.66 |
| 240 | 3-Oxotetradecanoic acid        | HMDB0010730 | 7.88_241.1798m/z  | RP ESI-    | 15.73 |
| 241 | LysoPE(16:0)                   | HMDB0011473 | 9.36_474.2614m/z  | RP ESI-    | 15.79 |
| 242 | 3-Hydroxycapric acid           | HMDB0002203 | 7.67_169.1224m/z  | RP ESI-    | 15.82 |
| 243 | Pyrocatechol sulfate           | HMDB0059724 | 20.80_188.9845m/z | RP ESI-    | 15.84 |
| 244 | MG(22:5)                       | HMDB0011555 | 1.15_387.2899m/z  | HILIC ESI+ | 15.86 |
| 245 | 6-Keto-prostaglandin F1a       | HMDB0002886 | 13.35_351.2210m/z | RP ESI-    | 15.91 |
| 246 | Methylpyrazine                 | HMDB0033112 | 4.17_187.0981m/z  | RP ESI-    | 15.92 |
| 247 | Picolinoylglycine              | HMDB0059766 | 9.00_217.0023m/z  | HILIC ESI- | 15.92 |
| 248 | Cuminaldehyde                  | HMDB0002214 | 6.83_169.0645m/z  | RP ESI-    | 15.99 |
| 249 | Cortolone-3-glucuronide        | HMDB0010320 | 4.45_541.2644m/z  | RP ESI-    | 16.04 |
| 250 | xi-10-Hydroxyoctadecanoic acid | HMDB0037396 | 12.36_281.2510m/z | RP ESI-    | 16.13 |
| 251 | P,P-Dioctyldiphenylamine       | HMDB0061926 | 7.55_416.3271m/z  | RP ESI+    | 16.29 |
| 252 | Oxychlorane                    | HMDB0059571 | 0.63_384.7667m/z  | RP ESI+    | 16.32 |
| 253 | 3-Hydroxydodecanoic acid       | HMDB0000387 | 4.88_253.1220m/z  | RP ESI-    | 16.39 |
| 254 | Tetradecanoylcarnitine         | HMDB0005066 | 5.73_372.3120m/z  | HILIC ESI+ | 16.4  |
| 255 | PC(20:4_16:0)                  | HMDB0008462 | 5.11_782.5737m/z  | HILIC ESI+ | 16.54 |
| 256 | Styrene                        | HMDB0034240 | 5.67_149.0607m/z  | RP ESI-    | 16.55 |
| 257 | Anandamide                     | HMDB0004080 | 1.17_347.2820n    | HILIC ESI+ | 16.57 |
| 258 | 5-Tetradecenoic acid           | HMDB0000499 | 1.17_227.2007m/z  | HILIC ESI+ | 16.62 |
| 259 | 5-Hydroxylysine                | HMDB0000450 | 8.40_162.1007n    | RP ESI-    | 16.65 |
| 260 | Dodecanedioic acid             | HMDB0000623 | 7.30_211.1328m/z  | RP ESI-    | 16.68 |
| 261 | PC(22:4_14:0)                  | HMDB0008623 | 8.38_818.5181m/z  | RP ESI-    | 16.71 |
| 262 | 1-Dodecene                     | HMDB0059874 | 9.83_213.1850m/z  | RP ESI-    | 16.72 |
| 263 | 2-Heptenal                     | HMDB0033827 | 9.11_223.1691m/z  | RP ESI-    | 16.75 |
| 264 | gammCEHC                       | HMDB0001931 | 7.56_245.1173m/z  | RP ESI-    | 16.75 |

|     |                                                               |             |                   |            |       |
|-----|---------------------------------------------------------------|-------------|-------------------|------------|-------|
| 265 | Indoleacrylic acid                                            | HMDB0000734 | 5.65_187.0631n    | HILIC ESI+ | 16.79 |
| 266 | Pregnanetriol                                                 | HMDB0006070 | 5.66_337.2732m/z  | HILIC ESI+ | 16.83 |
| 267 | (-)-Neoisomenthol                                             | HMDB0035764 | 1.09_311.2955m/z  | HILIC ESI- | 16.87 |
| 268 | 3,5-Bis(1,1-dimethylethyl)-4-hydroxy-benzoic acid ethyl ester | HMDB0061935 | 19.65_309.1705m/z | HILIC ESI- | 16.95 |
| 269 | Glycyl-Histidine                                              | HMDB0028843 | 1.04_212.0912n    | HILIC ESI+ | 16.97 |
| 270 | 3'-Hydroxy-e,e-caroten-3-one                                  | HMDB0002020 | 18.00_549.4108m/z | RP ESI+    | 17.07 |
| 271 | 4-Hydroxy-5-(dihydroxyphenyl)-valeric acid-O-sulphate         | HMDB0059978 | 11.39_271.0246m/z | HILIC ESI+ | 17.07 |
| 272 | 3-Hexenyl salicylic acid                                      | HMDB0061823 | 7.11_220.1090n    | RP ESI-    | 17.09 |
| 273 | MG(16:0)                                                      | HMDB0011533 | 5.71_313.2733m/z  | HILIC ESI+ | 17.19 |
| 274 | N6-Carbamoyl-L-threonyl-adenosine                             | HMDB0041623 | 18.75_411.1492n   | RP ESI-    | 17.19 |
| 275 | Norepinephrine                                                | HMDB0000216 | 0.81_150.0570m/z  | HILIC ESI- | 17.19 |
| 276 | Myo-inositol hexakisphosphate                                 | HMDB0003502 | 0.59_659.8632n    | RP ESI+    | 17.23 |
| 277 | Benzeneacetamide-4-O-sulphate                                 | HMDB0059994 | 2.75_230.0127m/z  | RP ESI-    | 17.29 |
| 278 | Pregnenolone sulfate                                          | HMDB0000774 | 0.81_395.1898m/z  | HILIC ESI- | 17.31 |
| 279 | trans-Jasmone                                                 | HMDB0031454 | 5.31_209.1175m/z  | RP ESI-    | 17.33 |
| 280 | Trihexosylceramide (d18:1_18:0)                               | HMDB0004880 | 1.68_1050.6845m/z | HILIC ESI- | 17.33 |
| 281 | Tridecanoic acid                                              | HMDB0000910 | 7.32_235.1695m/z  | RP ESI-    | 17.34 |
| 282 | LysoPC(22:0)                                                  | HMDB0010398 | 11.81_562.4207m/z | RP ESI+    | 17.42 |
| 283 | PC(14:1_16:1)                                                 | HMDB0007903 | 9.80_719.5386m/z  | RP ESI+    | 17.42 |
| 284 | Tetraethylene glycol                                          | HMDB0094708 | 6.75_387.2199m/z  | HILIC ESI- | 17.44 |
| 285 | Ibuprofen                                                     | HMDB0001925 | 7.99_251.1286m/z  | RP ESI-    | 17.45 |
| 286 | 12(13)Ep-9-KODE                                               | HMDB0013623 | 8.06_309.2062m/z  | RP ESI-    | 17.48 |
| 287 | Oxoglutaric acid                                              | HMDB0000208 | 0.90_191.0197m/z  | RP ESI-    | 17.51 |
| 288 | PC(22:5_14:0)                                                 | HMDB0008689 | 5.12_779.5493n    | HILIC ESI+ | 17.53 |
| 289 | PG(16:0_22:4)                                                 | HMDB0010581 | 5.41_816.5722m/z  | HILIC ESI+ | 17.55 |
| 290 | Heptanoic acid                                                | HMDB0000666 | 16.25_129.0910m/z | RP ESI-    | 17.56 |
| 291 | 4-Hydroxyphenytoin                                            | HMDB0041905 | 2.99_267.0765m/z  | HILIC ESI- | 17.57 |
| 292 | Lidocaine                                                     | HMDB0014426 | 12.82_467.3381m/z | RP ESI-    | 17.7  |

|     |                                                           |             |                   |            |       |
|-----|-----------------------------------------------------------|-------------|-------------------|------------|-------|
| 293 | N-Acetylglutamine                                         | HMDB0006029 | 1.05_187.0717m/z  | RP ESI-    | 17.7  |
| 294 | Ethylhexyl salicylate                                     | HMDB0061839 | 8.33_231.1379m/z  | RP ESI-    | 17.72 |
| 295 | CE(15:0)                                                  | HMDB0060057 | 12.58_649.5311m/z | RP ESI+    | 17.78 |
| 296 | Agmatine                                                  | HMDB0001432 | 4.71_165.0910m/z  | RP ESI-    | 17.81 |
| 297 | MG(20:5)                                                  | HMDB0011550 | 5.66_394.2950m/z  | HILIC ESI+ | 17.83 |
| 298 | LysoPA(18:0)                                              | HMDB0007850 | 11.06_483.2720m/z | RP ESI-    | 17.86 |
| 299 | LysoPE(15:0)                                              | HMDB0011502 | 3.34_460.2405m/z  | RP ESI-    | 17.87 |
| 300 | CE(16:2)                                                  | HMDB0060058 | 11.72_659.5164m/z | RP ESI+    | 18    |
| 301 | 9,12,13-TriHOME                                           | HMDB0004708 | 5.60_329.2325m/z  | RP ESI-    | 18.01 |
| 302 | Squalene                                                  | HMDB0000256 | 1.08_449.3570m/z  | HILIC ESI+ | 18.01 |
| 303 | 2-Tetradecanone                                           | HMDB0030924 | 3.68_230.2489m/z  | HILIC ESI+ | 18.06 |
| 304 | Perfluorooctanesulfonic acid                              | HMDB0059586 | 0.71_498.9298m/z  | HILIC ESI- | 18.14 |
| 305 | xi-gammUndecalactone                                      | HMDB0038311 | 5.31_165.1276m/z  | RP ESI-    | 18.15 |
| 306 | Eugenol                                                   | HMDB0005809 | 1.10_147.0799m/z  | HILIC ESI+ | 18.16 |
| 307 | $\alpha$ -CEHC                                            | HMDB0001518 | 8.21_277.1431m/z  | RP ESI-    | 18.21 |
| 308 | Erucic acid                                               | HMDB0002068 | 1.09_338.3185n    | HILIC ESI- | 18.22 |
| 309 | N-Acetylhistamine                                         | HMDB0013253 | 8.46_305.1750m/z  | RP ESI-    | 18.22 |
| 310 | 2,4-Dimethyladipic acid                                   | HMDB0059727 | 4.28_173.0808m/z  | RP ESI-    | 18.29 |
| 311 | 2,3-Dinor-TXB2                                            | HMDB0002904 | 7.73_323.1853m/z  | RP ESI-    | 18.33 |
| 312 | PC(16:1_20:0)                                             | HMDB0008010 | 10.55_716.4586m/z | RP ESI+    | 18.34 |
| 313 | PS(18:0_20:3)                                             | HMDB0012382 | 5.27_796.5468m/z  | HILIC ESI+ | 18.49 |
| 314 | 4-Hydroxy-5-(3'-hydroxyphenyl)-valeric acid-3'-O-sulphate | HMDB0059975 | 11.13_311.0216m/z | HILIC ESI- | 18.52 |
| 315 | TG(20:0_18:0_22:4)                                        | HMDB0046248 | 7.40_991.8446m/z  | HILIC ESI+ | 18.64 |
| 316 | PC(18:1_20:4)                                             | HMDB0008081 | 5.01_830.5667m/z  | HILIC ESI+ | 18.72 |
| 317 | DG(18:4_18:1)                                             | HMDB0007334 | 18.55_637.4833m/z | RP ESI+    | 18.78 |
| 318 | DG(22:6_16:0)                                             | HMDB0007765 | 19.24_679.4761m/z | RP ESI+    | 18.78 |
| 319 | Naproxen                                                  | HMDB0001923 | 6.32_267.0419m/z  | RP ESI-    | 18.79 |
| 320 | DG(20:5_16:1)                                             | HMDB0007563 | 10.84_651.4443m/z | RP ESI+    | 18.8  |
| 321 | CE(22:5)                                                  | HMDB0010375 | 2.25_737.5675m/z  | HILIC ESI+ | 18.95 |

|     |                                      |             |                   |            |       |
|-----|--------------------------------------|-------------|-------------------|------------|-------|
| 322 | 1-Stearoylglycerophosphoinositol     | HMDB0061696 | 9.71_621.3038m/z  | RP ESI-    | 18.97 |
| 323 | Oleoyl glycine                       | HMDB0013631 | 7.05_374.2441m/z  | RP ESI-    | 18.98 |
| 324 | 4-Hydroxydebrisoquine                | HMDB0006468 | 6.80_236.1045m/z  | RP ESI-    | 19.06 |
| 325 | 4alphCarboxy-5alphcholest8-en-3betol | HMDB0012166 | 16.61_430.3406n   | RP ESI+    | 19.09 |
| 326 | Aconitic acid                        | HMDB0000072 | 1.04_174.0165n    | HILIC ESI+ | 19.1  |
| 327 | Urocanic acid                        | HMDB0000301 | 20.77_174.9903m/z | RP ESI-    | 19.13 |
| 328 | Serylproline                         | HMDB0029047 | 1.05_201.0872m/z  | RP ESI-    | 19.16 |
| 329 | Cholenic acid                        | HMDB0000308 | 11.89_355.2638m/z | RP ESI-    | 19.17 |
| 330 | MG(15:0)                             | HMDB0011532 | 1.08_299.2602m/z  | HILIC ESI+ | 19.22 |
| 331 | TG(22:6_22:6_22:6)                   | HMDB0010562 | 8.60_1021.7208m/z | RP ESI-    | 19.22 |
| 332 | LysoPE(20:2)                         | HMDB0011483 | 7.96_504.3105m/z  | RP ESI-    | 19.23 |
| 333 | Phenol sulphate                      | HMDB0060015 | 3.24_172.9915m/z  | RP ESI-    | 19.28 |
| 334 | 2-Heptanone                          | HMDB0003671 | 2.85_227.2014m/z  | HILIC ESI- | 19.3  |
| 335 | Pentadecane                          | HMDB0059886 | 7.37_212.2519n    | RP ESI-    | 19.38 |
| 336 | PE(18:1_P-18:0)                      | HMDB0009049 | 2.41_712.5674m/z  | HILIC ESI+ | 19.4  |
| 337 | Triethanolamine                      | HMDB0032538 | 1.57_130.0867m/z  | RP ESI-    | 19.47 |
| 338 | Methyl stearate                      | HMDB0034154 | 1.09_297.2791m/z  | HILIC ESI- | 19.48 |
| 339 | SM(d18:0_14:0)                       | HMDB0012085 | 20.78_677.5569m/z | RP ESI+    | 19.49 |
| 340 | DG(18:3_18:2)                        | HMDB0007306 | 1.01_653.4487m/z  | HILIC ESI+ | 19.59 |
| 341 | PE(16:0_20:4)                        | HMDB0008937 | 12.01_704.4953m/z | RP ESI+    | 19.68 |
| 342 | 3,4-Methylene suberic acid           | HMDB0059768 | 5.50_197.0808m/z  | RP ESI-    | 19.72 |
| 343 | PC(18:2_18:0)                        | HMDB0008135 | 5.16_786.6035m/z  | HILIC ESI+ | 19.72 |
| 344 | DG(18:4_20:2)                        | HMDB0007341 | 19.08_640.5087n   | RP ESI+    | 19.73 |
| 345 | PC(14:1_P-18:1)                      | HMDB0007930 | 8.60_758.5325m/z  | RP ESI-    | 19.79 |
| 346 | 4-Hydroxyproline                     | HMDB0000725 | 11.37_131.0586n   | HILIC ESI+ | 19.84 |
| 347 | PC(p-18:1_22:1)                      | HMDB0011290 | 5.47_843.6963m/z  | RP ESI+    | 19.86 |
| 348 | Phenylglyoxal                        | HMDB0061916 | 0.92_152.0707m/z  | HILIC ESI+ | 19.86 |
| 349 | Trimethylsilyl l-Alanine             | HMDB0094699 | 7.20_184.0755m/z  | HILIC ESI+ | 19.86 |
| 350 | 5-Aminopentanoic acid                | HMDB0003355 | 7.53_118.0867m/z  | HILIC ESI+ | 19.92 |
| 351 | Alphdimorphelic acid                 | HMDB0004670 | 1.11_296.2349n    | HILIC ESI- | 20.04 |

|     |                                                                     |             |                   |            |       |
|-----|---------------------------------------------------------------------|-------------|-------------------|------------|-------|
| 352 | Lysyl-Tyrosine                                                      | HMDB0028963 | 1.18_327.2018m/z  | HILIC ESI+ | 20.13 |
| 353 | Homoarginine                                                        | HMDB0000670 | 4.59_223.0960m/z  | RP ESI-    | 20.15 |
| 354 | PC(P-18:1_18:4)                                                     | HMDB0011280 | 0.63_802.5116m/z  | RP ESI+    | 20.2  |
| 355 | 5-AMMU                                                              | HMDB0004400 | 3.01_179.0566m/z  | RP ESI-    | 20.23 |
| 356 | 5-(3',5'-Dihydroxyphenyl)-<br>gammvalerolactone-O-sulphate-O-methyl | HMDB0060031 | 0.58_302.0445n    | RP ESI-    | 20.29 |
| 357 | p-Menth-1-en-4-ol                                                   | HMDB0035833 | 12.63_307.2645m/z | RP ESI-    | 20.32 |
| 358 | Eicosadienoic acid                                                  | HMDB0005060 | 1.10_329.2489m/z  | HILIC ESI- | 20.33 |
| 359 | LysoPE(18:3)                                                        | HMDB0011478 | 8.16_498.2560m/z  | RP ESI+    | 20.33 |
| 360 | 5-Tetradecenoylcarnitine                                            | HMDB0002014 | 5.71_370.2955m/z  | HILIC ESI+ | 20.34 |
| 361 | Carnitine                                                           | HMDB0000062 | 7.73_144.1032m/z  | HILIC ESI+ | 20.41 |
| 362 | 2-Ethyl-2-hexenal                                                   | HMDB0061945 | 1.04_149.0929m/z  | HILIC ESI+ | 20.51 |
| 363 | 4-Aminohippuric acid                                                | HMDB0001867 | 6.72_387.1322m/z  | HILIC ESI- | 20.52 |
| 364 | PC(16:0_18:1)                                                       | HMDB0007971 | 5.21_760.5872m/z  | HILIC ESI+ | 20.6  |
| 365 | MG(20:2)                                                            | HMDB0011544 | 17.36_383.3146m/z | RP ESI+    | 20.61 |
| 366 | SM(d16:1_24:1)                                                      | HMDB0011694 | 9.61_806.6273m/z  | RP ESI-    | 20.71 |
| 367 | PS(16:0_18:2)                                                       | HMDB0012358 | 8.38_804.5027m/z  | RP ESI-    | 20.82 |
| 368 | Histidylproline diketopiperazine                                    | HMDB0002053 | 1.38_231.1225m/z  | HILIC ESI+ | 20.83 |
| 369 | Carotene-3,3'-dione                                                 | HMDB0002193 | 13.98_564.3941n   | RP ESI+    | 20.86 |
| 370 | DG(15:0_20:1)                                                       | HMDB0007079 | 19.50_589.5168m/z | HILIC ESI- | 21.03 |
| 371 | Phosphoribosyl pyrophosphate                                        | HMDB0000280 | 6.18_390.9575m/z  | HILIC ESI+ | 21.03 |
| 372 | 3,4-Methyleneazelaic acid                                           | HMDB0059744 | 1.36_213.1120m/z  | HILIC ESI+ | 21.04 |
| 373 | Histidiny-Proline                                                   | HMDB0028893 | 6.97_275.1102m/z  | HILIC ESI+ | 21.14 |
| 374 | 2-Biphenylol                                                        | HMDB0032582 | 6.38_169.0659m/z  | RP ESI-    | 21.19 |
| 375 | Di-2-propenyl sulfide                                               | HMDB0036491 | 17.03_227.0917m/z | RP ESI-    | 21.19 |
| 376 | PS(14:0_18:2)                                                       | HMDB0012336 | 5.50_732.4795m/z  | HILIC ESI+ | 21.2  |
| 377 | Oxypurinol                                                          | HMDB0000786 | 3.74_133.0153m/z  | HILIC ESI- | 21.21 |
| 378 | 3-Oxochoolic acid                                                   | HMDB0000502 | 11.81_387.2509m/z | RP ESI-    | 21.22 |
| 379 | Hydroxytyrosol                                                      | HMDB0005784 | 16.39_307.1179m/z | RP ESI-    | 21.22 |
| 380 | SM(d18:0_20:2)                                                      | HMDB0013465 | 0.61_772.6347m/z  | RP ESI+    | 21.3  |

|     |                                          |             |                   |            |       |
|-----|------------------------------------------|-------------|-------------------|------------|-------|
| 381 | CE(18:2)                                 | HMDB0000610 | 13.35_687.5487m/z | RP ESI+    | 21.33 |
| 382 | PC(18:0_22:6)                            | HMDB0008057 | 5.01_856.5799m/z  | HILIC ESI+ | 21.39 |
| 383 | 2-Nonenal                                | HMDB0031269 | 6.16_185.1173m/z  | RP ESI-    | 21.42 |
| 384 | Cholic acid                              | HMDB0000619 | 13.82_447.2544m/z | RP ESI+    | 21.44 |
| 385 | PC(20:4_18:0)                            | HMDB0008431 | 5.07_810.6040m/z  | HILIC ESI+ | 21.6  |
| 386 | Benzoic acid                             | HMDB0001870 | 3.81_121.0288m/z  | RP ESI-    | 21.68 |
| 387 | lysoPC(26:1)                             | HMDB0029220 | 8.35_678.4700m/z  | RP ESI-    | 21.74 |
| 388 | Phenyllactic acid                        | HMDB0000563 | 2.58_166.0622n    | RP ESI-    | 21.75 |
| 389 | Methyl propenyl ketone                   | HMDB0001184 | 5.01_167.1063m/z  | RP ESI-    | 21.82 |
| 390 | Isoleucyl-Tryptophan                     | HMDB0028918 | 0.87_298.1581m/z  | HILIC ESI- | 21.83 |
| 391 | Naphthalene                              | HMDB0029751 | 3.59_128.0637n    | RP ESI-    | 21.88 |
| 392 | Pyridinoline                             | HMDB0000851 | 6.68_393.1761m/z  | RP ESI+    | 21.9  |
| 393 | Glutaminyglutamine                       | HMDB0028795 | 8.83_292.1593m/z  | HILIC ESI+ | 21.92 |
| 394 | Farnesol                                 | HMDB0004305 | 5.53_240.2322m/z  | HILIC ESI+ | 21.95 |
| 395 | 3-Methyl-2-butenal                       | HMDB0012157 | 9.08_102.0912m/z  | HILIC ESI+ | 21.98 |
| 396 | 3-Hydroxysuberic acid                    | HMDB0000325 | 1.05_190.0851n    | HILIC ESI+ | 22.02 |
| 397 | 3-Hydroxy-4,5-dimethyl-2(5H)-furanone    | HMDB0031306 | 0.73_109.0287m/z  | HILIC ESI- | 22.06 |
| 398 | Prostaglandin E3                         | HMDB0002664 | 5.05_350.2085n    | RP ESI-    | 22.06 |
| 399 | Indole                                   | HMDB0000738 | 2.94_116.0498m/z  | RP ESI-    | 22.11 |
| 400 | 5-Dodecenoic acid                        | HMDB0000529 | 7.13_243.1594m/z  | RP ESI-    | 22.26 |
| 401 | Kyotorphin                               | HMDB0005768 | 9.03_338.1835m/z  | HILIC ESI+ | 22.26 |
| 402 | Androsterone sulfate                     | HMDB0002759 | 6.58_369.1734m/z  | RP ESI-    | 22.28 |
| 403 | Octadecanedioic acid                     | HMDB0000782 | 12.11_314.2449n   | RP ESI-    | 22.3  |
| 404 | Diethanolamine                           | HMDB0004437 | 7.00_209.1521m/z  | RP ESI-    | 22.34 |
| 405 | Cer(d18:1_14:0)                          | HMDB0011773 | 16.94_509.4777n   | RP ESI+    | 22.36 |
| 406 | 15-Hydroxyeicosatrienoate                | HMDB0005045 | 9.16_322.2493n    | RP ESI-    | 22.45 |
| 407 | Sebacic acid                             | HMDB0000792 | 16.89_223.0957m/z | RP ESI-    | 22.48 |
| 408 | PS(16:1_18:1)                            | HMDB0012368 | 8.13_804.5027m/z  | RP ESI-    | 22.52 |
| 409 | Docosatrienoic acid                      | HMDB0002823 | 12.97_333.2789m/z | RP ESI-    | 22.54 |
| 410 | 4-(2,6,6-Trimethyl-1-cyclohexen-1-yl)-2- | HMDB0032913 | 7.37_193.1602m/z  | RP ESI-    | 22.59 |

|     |                                 |             |                    |            |       |
|-----|---------------------------------|-------------|--------------------|------------|-------|
|     | butanone                        |             |                    |            |       |
| 411 | Lysyl-Valine                    | HMDB0028964 | 13.49_266.1493m/z  | RP ESI-    | 22.59 |
| 412 | 5-Aminoimidazole-4-carboxamide  | HMDB0003192 | 3.70_251.1031m/z   | RP ESI-    | 22.62 |
| 413 | PE(16:1_P-16:0)                 | HMDB0008982 | 9.65_691.5439m/z   | RP ESI+    | 22.65 |
| 414 | Reticuline                      | HMDB0003601 | 1.12_312.1597m/z   | HILIC ESI+ | 22.68 |
| 415 | 9-HPODE                         | HMDB0006940 | 8.06_293.2134m/z   | RP ESI-    | 22.72 |
| 416 | 4-phenylbutanic acid-O-sulphate | HMDB0059983 | 6.18_227.0348m/z   | HILIC ESI+ | 22.77 |
| 417 | 2-Oleoyleglycerophosphocholine  | HMDB0061701 | 14.79_505.3483m/z  | RP ESI+    | 22.8  |
| 418 | CE(10:0)                        | HMDB0003603 | 7.99_523.4827m/z   | RP ESI+    | 22.81 |
| 419 | 15-Deoxy-d-12,14-PGJ2           | HMDB0005079 | 0.87_316.2032n     | HILIC ESI- | 22.94 |
| 420 | Angiotensin II                  | HMDB0001035 | 12.01_1063.5691m/z | HILIC ESI+ | 22.98 |
| 421 | Cotinine                        | HMDB0001046 | 7.15_351.1804m/z   | RP ESI-    | 23.01 |
| 422 | 2-Methylbutyrylglycine          | HMDB0000339 | 7.53_160.0969m/z   | HILIC ESI+ | 23.13 |
| 423 | Stearoylethanolamide            | HMDB0013078 | 1.12_310.3099m/z   | HILIC ESI+ | 23.17 |
| 424 | Diaminopimelic acid             | HMDB0001370 | 1.05_171.0761m/z   | RP ESI-    | 23.23 |
| 425 | Eicosenoic acid                 | HMDB0002231 | 1.17_328.3206m/z   | HILIC ESI+ | 23.33 |
| 426 | LysoPA(p-16:0)                  | HMDB0011154 | 10.37_431.1937m/z  | RP ESI-    | 23.34 |
| 427 | Valyl-Serine                    | HMDB0029136 | 0.59_225.0846m/z   | RP ESI-    | 23.38 |
| 428 | AlphTocotrienol                 | HMDB0006327 | 9.80_463.2992m/z   | RP ESI+    | 23.4  |
| 429 | Retinoyl b-glucuronide          | HMDB0003141 | 20.79_457.2249m/z  | RP ESI-    | 23.41 |
| 430 | 6A-hydroxy-dhea 3-sulfate       | HMDB0062544 | 4.73_383.1522m/z   | RP ESI-    | 23.42 |
| 431 | Tridecanal                      | HMDB0030928 | 7.82_243.1952m/z   | RP ESI-    | 23.42 |
| 432 | LysoPA(18:2)                    | HMDB0007856 | 12.48_399.2274m/z  | RP ESI+    | 23.5  |
| 433 | Calcidiol                       | HMDB0003550 | 1.05_383.3333m/z   | HILIC ESI+ | 23.56 |
| 434 | Thyroxine sulfate               | HMDB0002728 | 12.71_839.6394m/z  | RP ESI+    | 23.59 |
| 435 | CE(16:1)                        | HMDB0000658 | 2.39_605.5620m/z   | HILIC ESI+ | 23.61 |
| 436 | 5-hydroxyoct-5-enoylglycine     | HMDB0094763 | 7.53_180.1023m/z   | HILIC ESI+ | 23.64 |
| 437 | Menadione                       | HMDB0001892 | 3.61_207.0233m/z   | HILIC ESI- | 23.68 |
| 438 | PC(14:1_24:0)                   | HMDB0007926 | 9.49_854.6102m/z   | RP ESI+    | 23.69 |
| 439 | PC(14:0_P-18:1)                 | HMDB0007897 | 5.16_715.5504n     | HILIC ESI+ | 23.7  |

|     |                                                       |             |                   |            |       |
|-----|-------------------------------------------------------|-------------|-------------------|------------|-------|
| 440 | Tryptamine                                            | HMDB0000303 | 4.37_178.1349m/z  | HILIC ESI+ | 23.73 |
| 441 | 4-Methylcatechol                                      | HMDB0000873 | 16.40_247.0960m/z | RP ESI-    | 23.77 |
| 442 | Benzaldehyde                                          | HMDB0006115 | 0.73_151.0399m/z  | HILIC ESI- | 23.77 |
| 443 | Tetradecanedioic acid                                 | HMDB0000872 | 7.71_257.1751m/z  | RP ESI-    | 23.8  |
| 444 | 11-beta-Hydroxyandrosterone-3-glucuronide             | HMDB0010351 | 1.27_483.2565m/z  | HILIC ESI+ | 23.87 |
| 445 | SM C16:1                                              | HMDB0029216 | 1.09_680.5661m/z  | HILIC ESI+ | 23.9  |
| 446 | APGPR Enterostatin                                    | HMDB0006117 | 9.34_477.2610m/z  | RP ESI-    | 24.05 |
| 447 | 3-Buten-2-one 1-(2,3,6-trimethyl phenyl)              | HMDB0059677 | 7.57_233.1168m/z  | RP ESI-    | 24.07 |
| 448 | (3R,6'R)-3-Hydroxy-3',4'-didehydro-beta,gammacarotene | HMDB0112260 | 15.54_533.4166m/z | RP ESI+    | 24.11 |
| 449 | Lithocholytaurine                                     | HMDB0000722 | 10.17_504.2719m/z | RP ESI-    | 24.14 |
| 450 | Nonadecanoic acid                                     | HMDB0000772 | 0.43_297.2792m/z  | HILIC ESI- | 24.14 |
| 451 | PC(22:6_p-18:0)                                       | HMDB0008752 | 12.24_835.6387m/z | HILIC ESI+ | 24.18 |
| 452 | Trihydroxycoprostanic acid                            | HMDB0002163 | 1.11_464.3469n    | HILIC ESI- | 24.2  |
| 453 | PC(20:4_P-16:0)                                       | HMDB0008488 | 5.04_766.5774m/z  | HILIC ESI+ | 24.25 |
| 454 | Cinnamaldehyde                                        | HMDB0003441 | 1.13_132.0575n    | HILIC ESI+ | 24.27 |
| 455 | Cer(d18:1_18:1)                                       | HMDB0004948 | 19.74_563.5262n   | RP ESI+    | 24.46 |
| 456 | 5-Heptadecyl-1,3-benzenediol                          | HMDB0038530 | 18.67_393.2977m/z | RP ESI-    | 24.47 |
| 457 | Creatinine                                            | HMDB0000562 | 4.88_225.1124m/z  | RP ESI-    | 24.47 |
| 458 | m-Chlorobenzoic acid                                  | HMDB0001544 | 9.87_157.0058m/z  | HILIC ESI+ | 24.57 |
| 459 | Daidzein                                              | HMDB0003312 | 6.87_291.0070m/z  | HILIC ESI- | 24.64 |
| 460 | Stigmastanol                                          | HMDB0000494 | 1.07_455.3668m/z  | HILIC ESI+ | 24.65 |
| 461 | Sulfolithocholylglycine                               | HMDB0002639 | 6.58_512.2678m/z  | RP ESI-    | 24.65 |
| 462 | PE(16:0_18:0)                                         | HMDB0003990 | 14.03_419.3516m/z | RP ESI-    | 24.66 |
| 463 | Pyridoxine                                            | HMDB0000239 | 1.18_152.0699m/z  | HILIC ESI+ | 24.71 |
| 464 | Vitamin D3                                            | HMDB0000876 | 1.01_367.3377m/z  | HILIC ESI+ | 24.71 |
| 465 | 3,4-Methylenesebacic acid                             | HMDB0059729 | 6.21_207.1008m/z  | RP ESI-    | 24.76 |
| 466 | PC(20:3_18:0)                                         | HMDB0008399 | 5.06_794.6077m/z  | HILIC ESI+ | 24.76 |
| 467 | 1-Methoxy-4-propylbenzene                             | HMDB0032626 | 1.14_173.0928m/z  | HILIC ESI+ | 24.81 |
| 468 | Luteolin                                              | HMDB0005800 | 11.13_267.0296m/z | HILIC ESI- | 24.81 |



|     |                                                 |             |                   |            |       |
|-----|-------------------------------------------------|-------------|-------------------|------------|-------|
| 469 | Linalyl oxide                                   | HMDB0035907 | 10.72_339.2524m/z | RP ESI-    | 24.82 |
| 470 | 5-(3',4'-Dihydroxyphenyl)-<br>gammvalerolactone | HMDB0029185 | 5.20_415.1384m/z  | RP ESI-    | 24.84 |
| 471 | DG(22:2_18:4)                                   | HMDB0007657 | 13.37_668.5348n   | RP ESI+    | 24.84 |
| 472 | Uroporphyrin III                                | HMDB0000916 | 12.24_831.2429m/z | HILIC ESI+ | 24.87 |
| 473 | DG(16:0_18:3)                                   | HMDB0007104 | 1.01_613.4747m/z  | HILIC ESI+ | 24.91 |
| 474 | 2-Methoxy-4-vinylphenol                         | HMDB0013744 | 1.04_151.0755m/z  | HILIC ESI+ | 24.95 |
| 475 | MG(20:3)                                        | HMDB0011546 | 13.52_417.2400m/z | RP ESI-    | 24.97 |
| 476 | Niacinamide                                     | HMDB0001406 | 1.68_123.0556m/z  | HILIC ESI+ | 25.07 |
| 477 | LysoPC(24:0)                                    | HMDB0010405 | 7.24_590.4546m/z  | HILIC ESI+ | 25.1  |
| 478 | Uracil                                          | HMDB0000300 | 1.15_77.0124m/z   | HILIC ESI+ | 25.13 |
| 479 | SM(d18:1_14:0)                                  | HMDB0012097 | 14.06_674.5416n   | RP ESI+    | 25.15 |
| 480 | 1-Methylnicotinamide                            | HMDB0000699 | 11.39_160.0612m/z | HILIC ESI+ | 25.18 |
| 481 | PC(18:0_22:0)                                   | HMDB0008051 | 5.33_810.6659m/z  | RP ESI+    | 25.23 |
| 482 | Fructose 6-phosphate                            | HMDB0000124 | 6.77_305.0263m/z  | HILIC ESI- | 25.29 |
| 483 | Palmitic amide                                  | HMDB0012273 | 1.14_256.2631m/z  | HILIC ESI+ | 25.29 |
| 484 | 3'-O-Methyl(-)-epicatechin-5-O-sulphate         | HMDB0029176 | 6.77_387.0306m/z  | HILIC ESI- | 25.3  |
| 485 | 9-Hexadecenoylcarnitine                         | HMDB0013207 | 7.59_478.2936m/z  | RP ESI-    | 25.41 |
| 486 | Deoxy pyridinoline                              | HMDB0000569 | 4.18_430.2334m/z  | RP ESI+    | 25.41 |
| 487 | dCMP                                            | HMDB0001202 | 0.75_352.0578m/z  | HILIC ESI- | 25.53 |
| 488 | 2-Acetyl-4,5-dihydrothiazole                    | HMDB0033561 | 4.81_150.0007m/z  | RP ESI-    | 25.54 |
| 489 | LysoPC(O-18:0)                                  | HMDB0011149 | 9.93_544.3519m/z  | RP ESI-    | 25.61 |
| 490 | Threo-beta-phenylserine                         | HMDB0002184 | 0.95_180.0667m/z  | RP ESI-    | 25.63 |
| 491 | PC(o-18:1_18:2)                                 | HMDB0013429 | 5.15_770.6006m/z  | HILIC ESI+ | 25.65 |
| 492 | Guanine                                         | HMDB0000132 | 3.75_150.0420m/z  | HILIC ESI- | 25.66 |
| 493 | Trimethylsilyl nonanoic acid                    | HMDB0094668 | 0.96_275.1682m/z  | HILIC ESI- | 25.66 |
| 494 | 17-betaEstradiol-3-glucuronide                  | HMDB0006224 | 20.79_429.1938m/z | RP ESI-    | 25.71 |
| 495 | Glycyl-Methionine                               | HMDB0028847 | 6.61_227.0463m/z  | RP ESI-    | 25.74 |
| 496 | Cer(d18:0_14:0)                                 | HMDB0011759 | 5.93_529.5269m/z  | HILIC ESI+ | 25.76 |
| 497 | PE(14:0_18:0)                                   | HMDB0008826 | 12.09_730.4779m/z | RP ESI+    | 25.79 |

|     |                                         |             |                   |            |       |
|-----|-----------------------------------------|-------------|-------------------|------------|-------|
| 498 | PC(14:0_P-16:0)                         | HMDB0007895 | 20.78_707.5736m/z | RP ESI+    | 25.81 |
| 499 | Stearic acid                            | HMDB0000827 | 10.24_321.2209m/z | RP ESI-    | 25.89 |
| 500 | PS(18:2_14:1)                           | HMDB0012397 | 10.16_730.4688m/z | RP ESI+    | 25.9  |
| 501 | 5-Methoxyindoleacetate                  | HMDB0004096 | 5.95_188.0709m/z  | HILIC ESI+ | 25.92 |
| 502 | 2-Deoxytetrone acid                     | HMDB0000337 | 6.79_141.0160m/z  | HILIC ESI- | 25.93 |
| 503 | Suberylglycine                          | HMDB0000953 | 4.52_252.0865m/z  | RP ESI-    | 25.93 |
| 504 | Phenylacetylglutamine                   | HMDB0006344 | 3.41_263.1030m/z  | RP ESI-    | 25.94 |
| 505 | TG(16:0_16:0_18:1)                      | HMDB0005360 | 2.37_855.7384m/z  | HILIC ESI+ | 25.95 |
| 506 | 3beta,7alpha-Dihydroxy-5-cholestenoate  | HMDB0012454 | 1.13_415.3233m/z  | HILIC ESI+ | 25.99 |
| 507 | Umbelliferone                           | HMDB0029865 | 1.09_163.0393m/z  | HILIC ESI+ | 26.04 |
| 508 | Histidiny-Glycine                       | HMDB0028885 | 1.32_195.0877m/z  | HILIC ESI+ | 26.07 |
| 509 | Sinapic acid                            | HMDB0032616 | 6.38_447.1331m/z  | RP ESI-    | 26.08 |
| 510 | DG(18:1_16:1)                           | HMDB0007186 | 1.00_592.5037n    | HILIC ESI+ | 26.11 |
| 511 | Terephthalic acid                       | HMDB0002428 | 19.69_149.0232m/z | HILIC ESI+ | 26.11 |
| 512 | Tyramine-O-sulfate                      | HMDB0006409 | 4.59_198.0226m/z  | RP ESI-    | 26.12 |
| 513 | 5-alphaDihydrotestosterone glucuronide  | HMDB0006203 | 5.74_465.2487m/z  | RP ESI-    | 26.13 |
| 514 | 5,6-Dihydrouridine                      | HMDB0000497 | 6.02_245.0799m/z  | RP ESI-    | 26.16 |
| 515 | Cyclo(proline-leucine)                  | HMDB0034276 | 9.03_249.0979m/z  | HILIC ESI+ | 26.21 |
| 516 | gammaGlutamylcysteine                   | HMDB0001049 | 9.90_215.0472m/z  | HILIC ESI+ | 26.21 |
| 517 | PC(14:0_20:3)                           | HMDB0007881 | 5.13_755.5402n    | HILIC ESI+ | 26.23 |
| 518 | Tetrahydrocortisone                     | HMDB0000903 | 1.14_387.2157m/z  | HILIC ESI+ | 26.39 |
| 519 | TG(14:0_18:0_20:5)                      | HMDB0042957 | 2.39_821.7354m/z  | HILIC ESI+ | 26.41 |
| 520 | 2-Phenylethanol                         | HMDB0033944 | 1.14_105.0700m/z  | HILIC ESI+ | 26.46 |
| 521 | Queueine                                | HMDB0001495 | 0.89_553.2297m/z  | HILIC ESI- | 26.47 |
| 522 | MG(22:4)                                | HMDB0011554 | 5.50_389.3046m/z  | HILIC ESI+ | 26.51 |
| 523 | Mono-(2-ethyl-5-hydroxyhexyl) phthalate | HMDB0094679 | 5.62_293.1389m/z  | RP ESI-    | 26.6  |
| 524 | PS(18:2_14:0)                           | HMDB0012396 | 11.33_714.4756m/z | RP ESI+    | 26.71 |
| 525 | Isoleucyl-Serine                        | HMDB0028916 | 7.37_435.2490m/z  | RP ESI-    | 26.79 |
| 526 | Tridecanol                              | HMDB0013316 | 7.66_221.1893m/z  | RP ESI-    | 26.83 |
| 527 | Quinidine                               | HMDB0015044 | 4.04_324.1828n    | HILIC ESI+ | 26.85 |

|     |                                     |             |                   |            |       |
|-----|-------------------------------------|-------------|-------------------|------------|-------|
| 528 | Acetyl citrate                      | HMDB0059808 | 11.13_269.0089m/z | HILIC ESI- | 26.87 |
| 529 | 20-Carboxy-leukotriene B4           | HMDB0006059 | 1.35_367.2085m/z  | HILIC ESI+ | 26.88 |
| 530 | PC(P-18:1_16:1)                     | HMDB0011306 | 5.05_764.5582m/z  | HILIC ESI+ | 26.94 |
| 531 | Ergocalciferol                      | HMDB0000900 | 13.82_379.3399m/z | RP ESI+    | 27    |
| 532 | PS(18:2)_18:0)                      | HMDB0012400 | 5.31_788.5440m/z  | HILIC ESI+ | 27.03 |
| 533 | 2-Furoylglycine                     | HMDB0000439 | 11.48_187.0712m/z | HILIC ESI+ | 27.15 |
| 534 | PC(18:0_22:5)                       | HMDB0008055 | 5.01_858.5938m/z  | HILIC ESI+ | 27.16 |
| 535 | Tyrosyl-Phenylalanine               | HMDB0029112 | 8.03_328.1430n    | RP ESI-    | 27.18 |
| 536 | 12,13-DHOME                         | HMDB0004705 | 11.04_335.2194m/z | RP ESI-    | 27.24 |
| 537 | DG(16:0_22:6)                       | HMDB0007121 | 8.60_675.4705m/z  | RP ESI-    | 27.24 |
| 538 | PC(18:0_14:1)                       | HMDB0008032 | 5.26_754.5354m/z  | HILIC ESI+ | 27.27 |
| 539 | DG(18:3_18:2)                       | HMDB0007277 | 18.44_615.4999m/z | RP ESI+    | 27.32 |
| 540 | N1-Methyl-2-pyridone-5-carboxamide  | HMDB0004193 | 3.59_152.0580n    | RP ESI-    | 27.33 |
| 541 | PC(o-16:0_18:0)                     | HMDB0013405 | 1.05_770.5970m/z  | HILIC ESI+ | 27.34 |
| 542 | PS(18:0_18:0)                       | HMDB0012378 | 5.30_774.5640m/z  | HILIC ESI+ | 27.46 |
| 543 | 2-Hydroxyhexadecanoic acid          | HMDB0031057 | 9.11_272.2345n    | RP ESI-    | 27.49 |
| 544 | Lactosylceramide (d18:1_22:0)       | HMDB0011594 | 2.16_980.6804m/z  | HILIC ESI- | 27.66 |
| 545 | MG(22:6)                            | HMDB0011557 | 5.52_402.2769n    | HILIC ESI+ | 27.77 |
| 546 | 2-Hydroxyadipic acid                | HMDB0000321 | 9.89_185.0415m/z  | HILIC ESI+ | 27.8  |
| 547 | 5-Phenylvaleric acid                | HMDB0002043 | 18.76_161.0962m/z | HILIC ESI+ | 27.85 |
| 548 | 14,15-DiHETrE                       | HMDB0002265 | 5.82_356.2791m/z  | HILIC ESI+ | 27.89 |
| 549 | PI(16:0_20:2)                       | HMDB0009786 | 13.37_880.5890m/z | RP ESI+    | 27.93 |
| 550 | Phytoene                            | HMDB0002181 | 11.40_581.4543m/z | RP ESI-    | 27.96 |
| 551 | 5-Tricosyl-1,3-benzenediol          | HMDB0038524 | 10.74_477.3913m/z | RP ESI-    | 28.01 |
| 552 | Cystinylglycine                     | HMDB0000709 | 11.53_315.0802m/z | HILIC ESI+ | 28.02 |
| 553 | 3,4-Methylenepimelic acid           | HMDB0059730 | 20.80_221.0237m/z | RP ESI-    | 28.06 |
| 554 | PC(22:6_18:0)                       | HMDB0008727 | 5.05_834.6019m/z  | HILIC ESI+ | 28.1  |
| 555 | Glycoursodeoxycholic acid 3-sulfate | HMDB0002409 | 5.89_529.2691n    | RP ESI-    | 28.11 |
| 556 | Cholesterol sulfate                 | HMDB0000653 | 15.04_465.3043m/z | RP ESI-    | 28.26 |
| 557 | Carnosine                           | HMDB0000033 | 18.48_261.0761m/z | RP ESI-    | 28.29 |

|     |                                     |             |                   |            |       |
|-----|-------------------------------------|-------------|-------------------|------------|-------|
| 558 | N-Oleylethanolamine                 | HMDB0002088 | 4.90_308.2946m/z  | HILIC ESI+ | 28.3  |
| 559 | Urobilin                            | HMDB0004161 | 8.21_569.2725m/z  | RP ESI-    | 28.37 |
| 560 | Phenol                              | HMDB0000228 | 0.75_93.0351m/z   | HILIC ESI- | 28.38 |
| 561 | 2-Methylacetophenone                | HMDB0032386 | 0.84_422.2340n    | HILIC ESI+ | 28.45 |
| 562 | PG(18:0_22:6)                       | HMDB0010614 | 5.33_840.5728m/z  | HILIC ESI+ | 28.53 |
| 563 | Tetrahydroaldosterone-3-glucuronide | HMDB0010357 | 4.56_539.2488m/z  | RP ESI-    | 28.58 |
| 564 | AlphCryptoxanthin                   | HMDB0002268 | 18.70_535.4307m/z | RP ESI+    | 28.59 |
| 565 | 2,6-Di-tert-butyl-4-methylphenol    | HMDB0033826 | 7.00_220.1810n    | RP ESI-    | 28.71 |
| 566 | 2-Undecanol                         | HMDB0030942 | 1.14_172.1843n    | HILIC ESI- | 28.91 |
| 567 | Sucralose                           | HMDB0031554 | 0.58_441.0164m/z  | RP ESI-    | 29    |
| 568 | Ergosterol                          | HMDB0000878 | 11.48_435.3044m/z | RP ESI+    | 29.03 |
| 569 | Hexadecyl Benzoic acid              | HMDB0094685 | 5.72_367.2616m/z  | RP ESI-    | 29.24 |
| 570 | PC(14:1_18:1)                       | HMDB0007905 | 5.26_730.5396m/z  | HILIC ESI+ | 29.28 |
| 571 | PG(18:1_18:0)                       | HMDB0010617 | 18.58_777.5701m/z | RP ESI+    | 29.34 |
| 572 | Octaethylene glycol                 | HMDB0094680 | 1.18_371.2274m/z  | HILIC ESI+ | 29.35 |
| 573 | 3-Hepteneoylglycine                 | HMDB0094729 | 7.64_185.1053n    | HILIC ESI+ | 29.38 |
| 574 | 3-Hydroxydodecanedioic acid         | HMDB0000413 | 6.48_267.1202m/z  | RP ESI-    | 29.47 |
| 575 | 13-HPODE                            | HMDB0003871 | 6.66_333.2059m/z  | RP ESI-    | 29.54 |
| 576 | 9,12-Hexadecadienoylcarnitine       | HMDB0013334 | 1.05_413.3351m/z  | HILIC ESI+ | 29.62 |
| 577 | Sphingosine 1-phosphate             | HMDB0000277 | 7.24_424.2457m/z  | RP ESI-    | 29.65 |
| 578 | Dihydroxy-1H-indole glucuronide I   | HMDB0059997 | 0.91_325.0812n    | RP ESI-    | 29.77 |
| 579 | Inosine                             | HMDB0000195 | 2.91_291.0700m/z  | HILIC ESI+ | 29.79 |
| 580 | LysoPC(18:3)                        | HMDB0010387 | 11.43_518.3264m/z | RP ESI+    | 29.79 |
| 581 | PG(16:0_16:0)                       | HMDB0010570 | 13.47_740.5389m/z | RP ESI+    | 29.8  |
| 582 | Sumiki's acid                       | HMDB0002432 | 9.87_160.0603m/z  | HILIC ESI+ | 29.86 |
| 583 | 3-Sulfodeoxycholic acid             | HMDB0002504 | 8.16_459.2420m/z  | RP ESI+    | 30    |

**Supplemental Table S10-A: Adjusted Beta Coefficients\***

Dependent Variable: Mean pressure gradient

|   |              | Unstandardized Coefficients |            | Standardized Coefficients | t-value | p-value |
|---|--------------|-----------------------------|------------|---------------------------|---------|---------|
|   |              | Beta                        | Std. Error | Beta                      |         |         |
| 1 | Total LPA    | 8.523                       | 3.825      | 0.253                     | 2.229   | 0.029   |
| 2 | 16:0 Lyso PA | 24.066                      | 11.035     | 0.25                      | 2.181   | 0.033   |
| 3 | 18:0 Lyso PA | 44.401                      | 21.281     | 0.243                     | 2.086   | 0.041   |
| 4 | 18:1 Lyso PA | 24.776                      | 18.426     | 0.155                     | 1.345   | NS      |
| 5 | 18:2 Lyso PA | 44.592                      | 20.264     | 0.248                     | 2.201   | 0.031   |
| 6 | 20:4 Lyso PA | 64.529                      | 29.975     | 0.243                     | 2.153   | 0.035   |
| 7 | 22:6 Lyso PA | 107.243                     | 62.43      | 0.197                     | 1.718   | NS      |

\* All models are adjusting for age, gender, LDL, HDL, TG, history of hypertension, history of smoking and presence of bicuspid aortic valve. Abbreviations: Std. Error, Standard Error

**Supplemental Table S10-B: Adjusted Beta Coefficients\***

Dependent Variable: Aortic valve area

|   |              | Unstandardized Coefficients |            | Standardized Coefficients | t-value | p-value |
|---|--------------|-----------------------------|------------|---------------------------|---------|---------|
|   |              | Beta                        | Std. Error | Beta                      |         |         |
| 1 | Total LPA    | -0.214                      | 0.083      | -0.292                    | -2.571  | 0.013   |
| 2 | 16:0 Lyso PA | -0.71                       | 0.233      | -0.343                    | -3.05   | 0.003   |
| 3 | 18:0 Lyso PA | -1.009                      | 0.461      | -0.257                    | -2.188  | 0.032   |
| 4 | 18:1 Lyso PA | -0.741                      | 0.416      | -0.209                    | -1.782  | NS      |
| 5 | 18:2 Lyso PA | -0.948                      | 0.463      | -0.236                    | -2.048  | 0.045   |
| 6 | 20:4 Lyso PA | -0.999                      | 0.667      | -0.174                    | -1.499  | NS      |
| 7 | 22:6 Lyso PA | -3.445                      | 1.336      | -0.291                    | -2.578  | 0.012   |

\* All models are adjusting for age, gender, LDL, HDL, TG, history of hypertension, history of smoking and presence of bicuspid aortic valve. Abbreviations: Std. Error, Standard Error

**Supplemental Table S11:** Clinical demographics for subgroup comparison based on annualized change in maximum jet velocity ( $\Delta V_{max}$ )

| Parameter                                                  | Study Population (n=50)    |                             |                |
|------------------------------------------------------------|----------------------------|-----------------------------|----------------|
|                                                            | Slow progressors<br>(N=25) | Rapid progressors<br>(N=25) | <i>p-value</i> |
| Annualized $\Delta V_{max}$ ((m/s)/yr)                     | 0.18 (0.14,0.22)           | 0.5 (0.41,0.85)             | <0.001         |
| Age, yrs                                                   | 66 ± 14                    | 69 ± 10                     | 0.552          |
| Male sex, n                                                | 17(68)                     | 20 (80)                     | 0.333          |
| Height, cm                                                 | 171 ± 7                    | 172 ± 7                     | 0.452          |
| Weight, kg                                                 | 78 (72,96)                 | 86 (81,101)                 | 0.095          |
| Body surface area, m <sup>2</sup>                          | 1.9 ± 0.2                  | 2.0 ± 0.16                  | 0.345          |
| Body mass index, kg/m <sup>2</sup>                         | 29 ± 5.6                   | 29 ± 3.5                    | 0.788          |
| History of hypertension, n (%)                             | 13 (59)                    | 19 (79)                     | 0.139          |
| Smoking History, n (%)                                     | 14 (58)                    | 11 (46)                     | 0.386          |
| Current                                                    | 4 (17)                     | 2 (8)                       |                |
| Previous                                                   | 10 (42)                    | 9 (38)                      |                |
| Never                                                      | 10 (42)                    | 13 (54)                     |                |
| Medication, n (%)                                          |                            |                             |                |
| Antihypertensive treatment                                 | 14 (58)                    | 15 (63)                     | 0.768          |
| ACE inhibitors                                             | 5 (21)                     | 8 (33)                      | 0.330          |
| ARBs                                                       | 3 (13)                     | 3 (14)                      | 1.000          |
| Statins                                                    | 14 (58)                    | 17 (71)                     | 0.365          |
| Laboratory data                                            |                            |                             |                |
| LDL cholesterol, mmol/l                                    | 3.0 (2.4,3.7)              | 2.0 (1.4,2.5)               | 0.004          |
| HDL cholesterol, mmol/l                                    | 1.4 (1.1,1.5)              | 1.2 (1.0,1.5)               | 0.233          |
| Triglycerides, mmol/l                                      | 1.0 (0.8,1.6)              | 1.2 (0.9,1.6)               | 0.568          |
| Random glucose, mmol/l                                     | 6.2 (5.5,8.5)              | 6.5 (5.3,8.9)               | 0.793          |
| Creatinine, (μmol/l)                                       | 83.4 ± 20.8                | 86.8 ± 17.8                 | 0.535          |
| Doppler echocardiographic data                             |                            |                             |                |
| Bicuspid aortic valve, n (%)                               | 6 (24)                     | 6 (24)                      | 0.935          |
| Aortic valve calcification score, n (%)                    |                            |                             |                |
| Calcification score = 1                                    | 2 (8)                      | 1 (4)                       |                |
| Calcification score = 2                                    | 4 (16)                     | 6 (24)                      |                |
| Calcification score = 3                                    | 12 (48)                    | 13 (52)                     |                |
| Calcification score = 4                                    | 5 (20)                     | 3 (12)                      |                |
| Calcification score = 5                                    | 2 (8)                      | 2 (8)                       |                |
| Peak aortic jet velocity, m/s                              | 4.1 (3.6,4.4)              | 3.9 (3.8,4.6)               | 0.711          |
| Peak pressure gradient, mm Hg                              | 65 (53,78)                 | 61 (57,88)                  | 0.674          |
| Mean pressure gradient, mm Hg                              | 40 (28,49)                 | 39 (34,54)                  | 0.624          |
| Aortic valve area, cm <sup>2</sup>                         | 0.9 (0.7,1.0)              | 1.0 (0.9,1.1)               | 0.164          |
| Indexed aortic valve area, cm <sup>2</sup> /m <sup>2</sup> | 0.4 (0.3,0.6)              | 0.5 (0.4,0.5)               | 0.307          |
| Left ventricular mass index, g/m <sup>2</sup>              | 134 (98,146)               | 111 (88,137)                | 0.285          |
| Left ventricular ejection fraction                         | 60 (60,60)                 | 60 (60,60)                  | 0.646          |

Values are reported as mean  $\pm$  standard deviation (SD), median (25<sup>th</sup>, 75<sup>th</sup> percentiles), or count (percentage) as applicable. The Chi-square test was used for categorical variables, while Student's t-test or Mann-Whitney U test was used for continuous variables to assess for statistical significance across sample groups as applicable based on data distribution. Abbreviations:  $\Delta V_{max}$ , annualized change in maximum jet velocity; ACE, angiotensin-converting-enzyme; ARBs, angiotensin II receptor blockers; HDL, high-density lipoprotein; LDL, low-density lipoprotein

| <b>Supplemental Table S12: Clinical demographics for 19 patients used for plasma LysoPA lipidomics</b> |                                       |
|--------------------------------------------------------------------------------------------------------|---------------------------------------|
| <b>Parameter</b>                                                                                       | <b>Plasma study population (n=19)</b> |
| <b>Clinical</b>                                                                                        |                                       |
| Age, yrs                                                                                               | 70.3 (66,78)                          |
| Male sex, n (%)                                                                                        | 12 (63)                               |
| Height, cm                                                                                             | 170 (162,173)                         |
| Weight, kg                                                                                             | 91 (78,96)                            |
| Body surface area, m <sup>2</sup>                                                                      | 2.04 (1.8,2.1)                        |
| Body mass index, kg/m <sup>2</sup>                                                                     | 30.5 (27.1,33.9)                      |
| History of hypertension, n (%)                                                                         | 12 (63)                               |
| Smoking History, n (%)                                                                                 | 6 (32)                                |
| Current                                                                                                | 3 (16)                                |
| Previous                                                                                               | 1 (5)                                 |
| Never                                                                                                  | 10 (52)                               |
| <b>Medication, n (%)</b>                                                                               |                                       |
| Antihypertensive treatment                                                                             | 9 (47)                                |
| ACE inhibitors                                                                                         | 5 (26)                                |
| ARBs                                                                                                   | 2 (11)                                |
| Statins                                                                                                | 13 (68)                               |
| <b>Laboratory data</b>                                                                                 |                                       |
| LDL cholesterol, mmol/l                                                                                | 2.6 (2.0,3.0)                         |
| HDL cholesterol, mmol/l                                                                                | 1.1 (1.0,1.6)                         |
| Triglycerides, mmol/l                                                                                  | 1.2 (1.0,1.5)                         |
| Random glucose, mmol/l                                                                                 | 5.7 (5.2,7.1)                         |
| Creatinine, (μmol/l)                                                                                   | 85 (72,104)                           |
| <b>Doppler echocardiographic data</b>                                                                  |                                       |
| Bicuspid aortic valve, n (%)                                                                           | 2 (11)                                |
| <b>Aortic valve calcification score, n (%)</b>                                                         |                                       |
| Calcification score = 1                                                                                | 1 (5)                                 |
| Calcification score = 2                                                                                | 2 (11)                                |
| Calcification score = 3                                                                                | 9 (47)                                |
| Calcification score = 4                                                                                | 3 (16)                                |
| Calcification score = 5                                                                                | 2 (11)                                |
| Peak aortic jet velocity, m/s                                                                          | 4.4 (3.4,5.1)                         |
| Peak pressure gradient, mm Hg                                                                          | 77 (45,103)                           |
| Mean pressure gradient, mm Hg                                                                          | 46 (32,65)                            |
| Aortic valve area, cm <sup>2</sup>                                                                     | 0.81 (0.64,1.11)                      |
| Indexed aortic valve area, cm <sup>2</sup> /m <sup>2</sup>                                             | 0.46 (0.33,0.57)                      |
| Left ventricular mass index, g/m <sup>2</sup>                                                          | 128 (109,159)                         |



|                                                                                                                                                                                                                                                                                        |            |
|----------------------------------------------------------------------------------------------------------------------------------------------------------------------------------------------------------------------------------------------------------------------------------------|------------|
| <b>Left ventricular ejection fraction</b>                                                                                                                                                                                                                                              | 60 (55,60) |
| <b>Values are reported as median (25<sup>th</sup>, 75<sup>th</sup> percentiles) or count (percentage) as applicable. <u>Abbreviations</u>: ACE, angiotensin-converting-enzyme; ARBs, angiotensin II receptor blockers; HDL, high-density lipoprotein; LDL, low-density lipoprotein</b> |            |

**Supplemental Table S13:** Pearson correlation ( $r_p$ )

| Correlations   | 1     | 2     | 3     | 4     | 5     | 6     | 7   | 8     | 9     | 10    | 11    | 12    | 13    | 14 |
|----------------|-------|-------|-------|-------|-------|-------|-----|-------|-------|-------|-------|-------|-------|----|
| 1 P-16:0 LPA   |       |       |       |       |       |       |     |       |       |       |       |       |       |    |
| 2 P-18:0 LPA   | .87** |       |       |       |       |       |     |       |       |       |       |       |       |    |
| 3 P-18:1 LPA   | .92** | .74** |       |       |       |       |     |       |       |       |       |       |       |    |
| 4 P-18:2 LPA   | .71** | .48*  | .88** |       |       |       |     |       |       |       |       |       |       |    |
| 5 P-20:4 LPA   | .72** | .47*  | .79** | .79** |       |       |     |       |       |       |       |       |       |    |
| 6 P-22:6 LPA   | .94** | .81** | .89** | .76** | .81** |       |     |       |       |       |       |       |       |    |
| 7 P-Total LPA  | .98** | .84** | .97** | .82** | .79** | .96** |     |       |       |       |       |       |       |    |
| 8 T-16:0 LPA   | .4    | .17   | .45   | .35   | .49*  | .43   | .41 |       |       |       |       |       |       |    |
| 9 T-18:0 LPA   | .28   | .09   | .38   | .33   | .42   | .31   | .32 | .94** |       |       |       |       |       |    |
| 10 T-18:1 LPA  | .09   | -.17  | .24   | .44   | .36   | .14   | .17 | .58** | .66** |       |       |       |       |    |
| 11 T-18:2 LPA  | .4    | .14   | .49*  | .47*  | .70** | .46*  | .45 | .82** | .78** | .66** |       |       |       |    |
| 12 T-20:4 LPA  | .27   | .07   | .36   | .33   | .70** | .33   | .32 | .70** | .68** | .61** | .86** |       |       |    |
| 13 T-22:6 LPA  | .44   | .33   | .37   | .23   | .23   | .42   | .4  | .83** | .77** | .33   | .53*  | .27   |       |    |
| 14 T-Total LPA | .34   | .08   | .44   | .43   | .56*  | .39   | .39 | .94** | .93** | .79** | .91** | .82** | .69** |    |

\*\* Correlation is significant at the 0.01 level (2-tailed).

\* Correlation is significant at the 0.05 level (2-tailed).

Abbreviations: P –Plasma, T-Tissue

| <b>Supplemental Table S14: MS-MS transitions and experimental conditions of Lysophosphatidic acids (LysoPA)</b> |             |              |              |                   |            |            |
|-----------------------------------------------------------------------------------------------------------------|-------------|--------------|--------------|-------------------|------------|------------|
| Sl.No                                                                                                           | Analyte ID  | Q1 mass (Da) | Q3 mass (Da) | Internal standard | CE (volts) | DP (volts) |
| 1                                                                                                               | LysoPA 14:0 | 381.2        | 153.0        | LysoPA 17:0       | -25.0      | -100.0     |
| 2                                                                                                               | LysoPA 16:0 | 409.2        | 153.0        | LysoPA 17:0       | -30.0      | -110.0     |
| 3                                                                                                               | LysoPA 18:0 | 437.2        | 153.0        | LysoPA 17:0       | -30.0      | -110.0     |
| 4                                                                                                               | LysoPA 18:1 | 435.2        | 153.0        | LysoPA 17:0       | -30.0      | -110.0     |
| 5                                                                                                               | LysoPA 18:2 | 433.2        | 153.0        | LysoPA 17:0       | -30.0      | -100.0     |
| 6                                                                                                               | LysoPA 20:4 | 457.2        | 153.0        | LysoPA 17:0       | -30.0      | -110.0     |
| 7                                                                                                               | LysoPA 22:6 | 481.3        | 153.0        | LysoPA 17:0       | -30.0      | -100.0     |
| Abbreviations: CE-Collision Energy; DP-Declustering Potential                                                   |             |              |              |                   |            |            |

## References

- 1 Baumgartner, H. *et al.* Echocardiographic assessment of valve stenosis: EAE/ASE recommendations for clinical practice. *Journal of the American Society of Echocardiography : official publication of the American Society of Echocardiography* **22**, 1-23; quiz 101-102, doi:10.1016/j.echo.2008.11.029 (2009).
- 2 Lang, R. M. *et al.* Recommendations for cardiac chamber quantification by echocardiography in adults: an update from the American Society of Echocardiography and the European Association of Cardiovascular Imaging. *Journal of the American Society of Echocardiography : official publication of the American Society of Echocardiography* **28**, 1-39.e14, doi:10.1016/j.echo.2014.10.003 (2015).
- 3 Yousry, M. *et al.* Real-time imaging required for optimal echocardiographic assessment of aortic valve calcification. *Clin Physiol Funct Imaging* **32**, 470-475, doi:10.1111/j.1475-097X.2012.01153.x (2012).
- 4 Yousry, M. *et al.* Aortic valve type and calcification as assessed by transthoracic and transoesophageal echocardiography. *Clin Physiol Funct Imaging* **35**, 306-313, doi:10.1111/cpf.12166 (2015).
- 5 Nishimura, R. A. *et al.* 2014 AHA/ACC Guideline for the Management of Patients With Valvular Heart Disease: A Report of the American College of Cardiology/American Heart Association Task Force on Practice Guidelines. *Journal of the American College of Cardiology* **63**, e57-e185, doi:<https://doi.org/10.1016/j.jacc.2014.02.536> (2014).
- 6 Folch, J., Lees, M. & Sloane Stanley, G. H. A simple method for the isolation and purification of total lipides from animal tissues. *The Journal of biological chemistry* **226**, 497-509 (1957).
- 7 Wehrens, R. *et al.* Improved batch correction in untargeted MS-based metabolomics. *Metabolomics* **12**, 88-88, doi:10.1007/s11306-016-1015-8 (2016).
- 8 Torzewski, M. *et al.* Lipoprotein(a) Associated Molecules are Prominent Components in Plasma and Valve Leaflets in Calcific Aortic Valve Stenosis. *JACC. Basic to translational science* **2**, 229-240, doi:10.1016/j.jacbts.2017.02.004 (2017).
- 9 Wijesinghe, D. S. *et al.* Characterization of lysophosphatidic acid subspecies produced by autotaxin using a modified HPLC ESI-MS/MS method. *Analytical methods : advancing methods and applications* **3**, 2822-2828, doi:10.1039/c1ay05459g (2011).
- 10 Zhang, J. *et al.* An intelligentized strategy for endogenous small molecules characterization and quality evaluation of earthworm from two geographic origins by ultra-high performance HILIC/QTOF MS(E) and Progenesis Q1. *Analytical and bioanalytical chemistry* **408**, 3881-3890, doi:10.1007/s00216-016-9482-3 (2016).
- 11 Brunius, C., Shi, L. & Landberg, R. Large-scale untargeted LC-MS metabolomics data correction using between-batch feature alignment and cluster-based within-batch signal intensity drift correction. *Metabolomics* **12**, 173, doi:10.1007/s11306-016-1124-4 (2016).
- 12 Chetwynd, A. J., Abdul-Sada, A., Holt, S. G. & Hill, E. M. Use of a pre-analysis osmolality normalisation method to correct for variable urine concentrations and for improved metabolomic analyses. *Journal of chromatography. A* **1431**, 103-110, doi:10.1016/j.chroma.2015.12.056 (2016).

- 13 Wolf, S., Schmidt, S., Muller-Hannemann, M. & Neumann, S. In silico fragmentation for computer assisted identification of metabolite mass spectra. *BMC bioinformatics* **11**, 148, doi:10.1186/1471-2105-11-148 (2010).
- 14 Chong, J. & Xia, J. MetaboAnalystR: an R package for flexible and reproducible analysis of metabolomics data. *Bioinformatics (Oxford, England)* **34**, 4313-4314, doi:10.1093/bioinformatics/bty528 (2018).
